# Supplementary material for: How close are we to the temperature tipping point of the terrestrial biosphere?
Source: PubMed Central journal article supplement — Sci Adv. 2021 Jan 13;7(3):eaay1052. doi: 10.1126/sciadv.aay1052 (PMC7806211; doi:10.1126/sciadv.aay1052), 2021-01-13
Supplement: supp_7_3_eaay1052__1.pdf [file supp_7_3_eaay1052__1.pdf]

## Supplementary Materials for

### **How close are we to the temperature tipping point of the terrestrial biosphere?**

Katharyn A. Duffy\*, Christopher R. Schwalm, Vickery L. Arcus, George W. Koch, Liyin L. Liang, Louis A. Schipper

\*Corresponding author. Email: [katharyn.duffy@nau.edu](mailto:katharyn.duffy@nau.edu)

Published 13 January 2021, *Sci. Adv.* 7, eaay1052 (2021)

DOI: [10.1126/sciadv.aay1052](https://doi.org/10.1126/sciadv.aay1052)

#### **This PDF file includes:**

Figs. S1 to S6

Tables S1 to S3

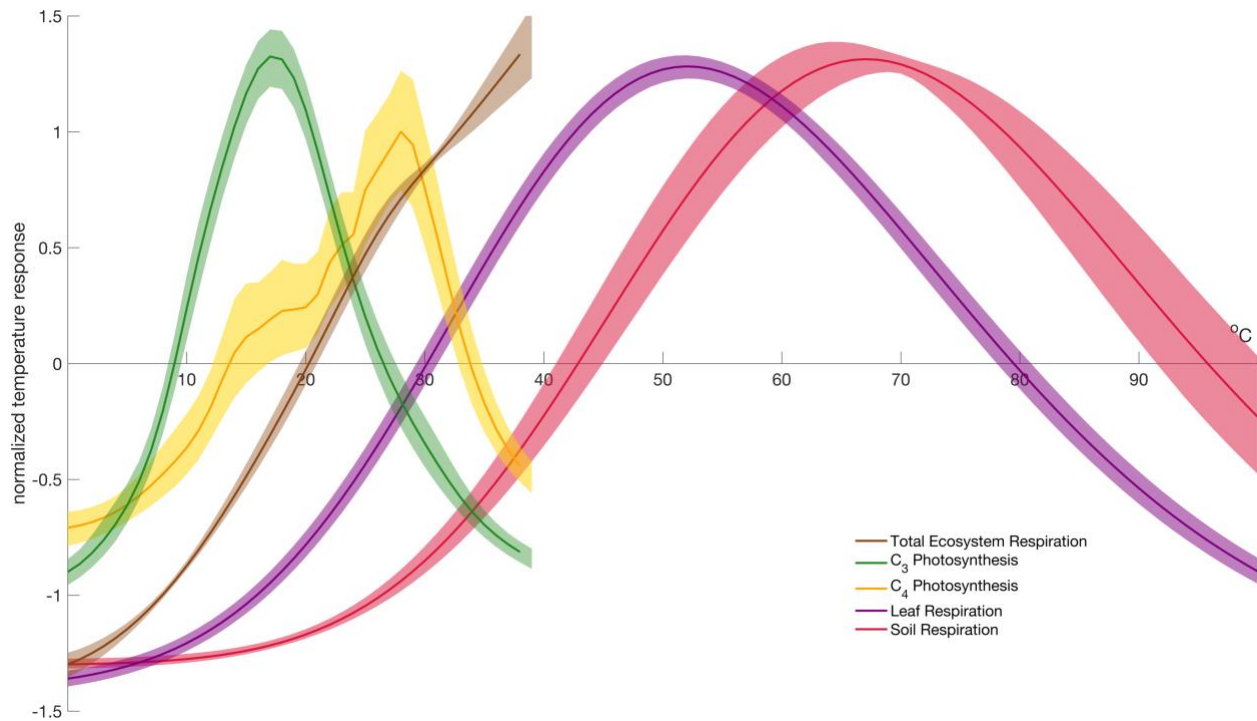

**Fig. S1 Temperature dependence of global carbon fluxes to 100°C.** The normalized global temperature response of C<sub>3</sub> photosynthesis (green), which exhibits  $T_P^{max}$  of 18°C, C<sub>4</sub> photosynthesis (yellow) which exhibits  $T_P^{max}$  at 28°C, and total ecosystem respiration (orange) derived from the FLUXNET 2015 synthesis dataset. The minor thermal optima observed in C<sub>4</sub> classified sites validates the mixed C<sub>3</sub>/C<sub>4</sub> nature of some sites and was well explained by the sum of two Gaussian curves (see methods). FLUXNET total ecosystem respiration only extends through temperatures where we were able to quantify response given the ambient temperature nature of tower data. Additional curves represent soil respiration (15) (red,  $T_R^{max}$  68°C) and leaf respiration (16) (purple,  $T_R^{max}$  55°C). All fluxes were normalized and fit over the temperatures observed by FLUXNET (up to 38°C) or experimental data (up to 100 °C) where the mean across each curve sums to zero. Shaded areas represent the 90% confidence interval of projections.

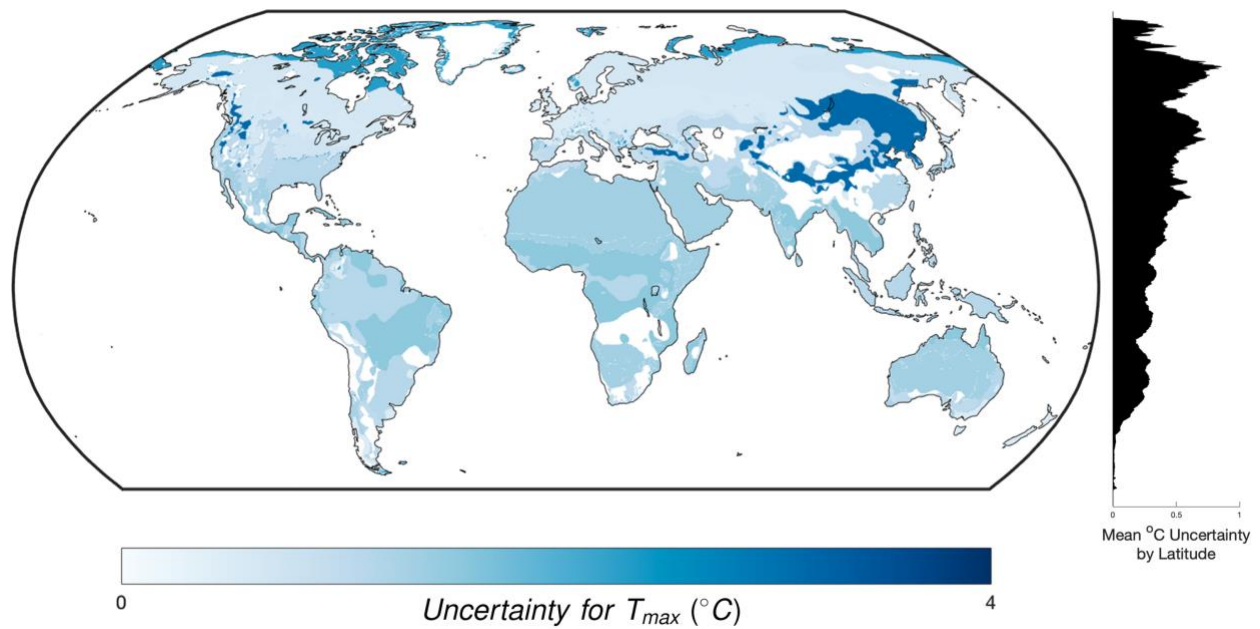

**Fig. S2 Spatial distribution of uncertainty for  $T_p^{max}$  (°C).** To investigate uncertainty in our constraint of  $T_p^{max}$  by biome we calculated the cross-bootstrap variability in  $T_p^{max}$  for all biomes investigated (Fig. S4). Uncertainty for  $T_p^{max}$  by biome was then spatially assigned to pixels that constitute that region. The vertical violin bar represents the mean uncertainty by latitude (°C).

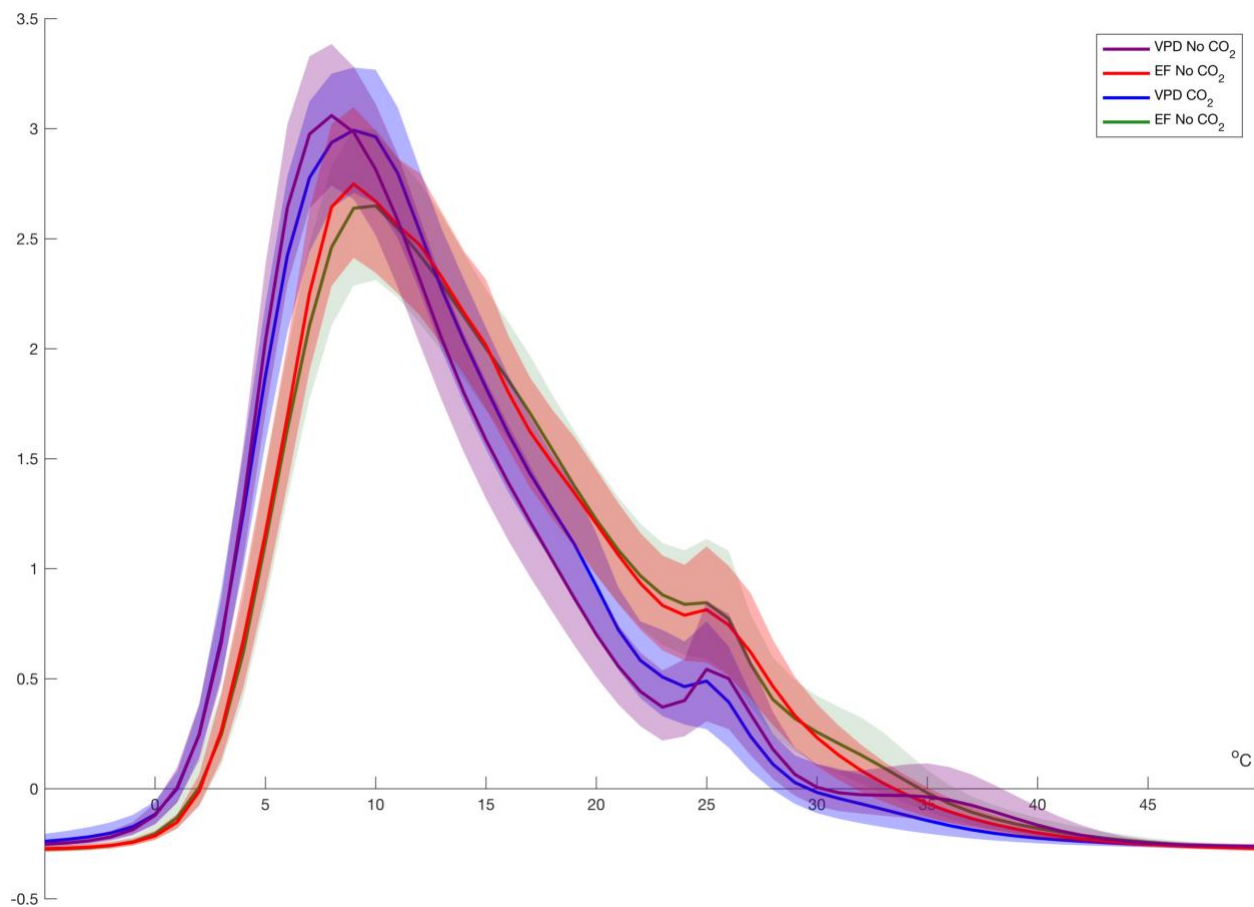

**Fig. S3 Between-model evaluation of temperature dependence.** Evaluation of partial correlation explanatory variables on the temperature dependence of gross primary production holding all other components identical. To evaluate the effects of Vapor Pressure Deficit (VPD) compared to Evaporative Fraction (EF) as well as with and without CO<sub>2</sub> as an explanatory variable, the entire analysis was run under multiple model frameworks. Given the 90% confidence interval overlap of all frameworks we see no evidence for bias in water metrics or inclusion of CO<sub>2</sub> into the analysis.

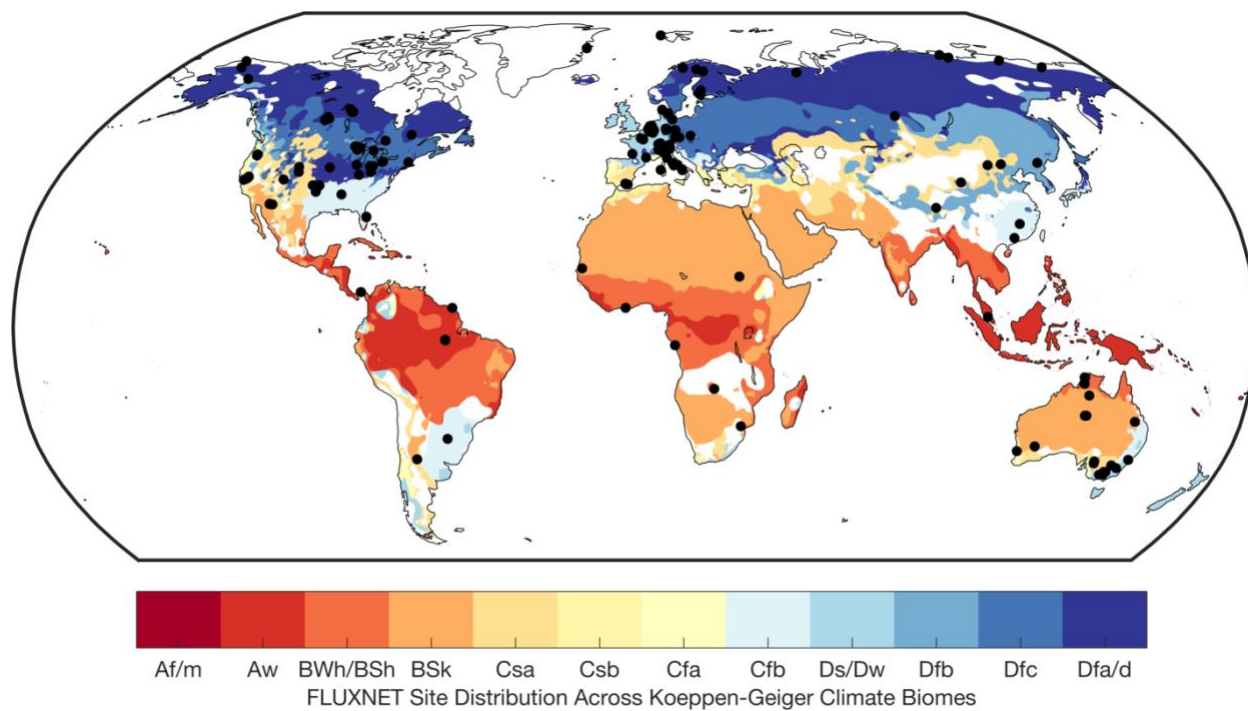

**Fig. S4 Distribution of Tier 1 and 2 FLUXNET sites used in this analysis by Koeppen-Geiger Classification.** FLUXNET sites were aggregated based on Koeppen-Geiger climate classification regions where the FLUXNET synthesis dataset retained a coverage of >5 sites. Classes lacking sufficient replication were collapsed to the next level of climatological organization.

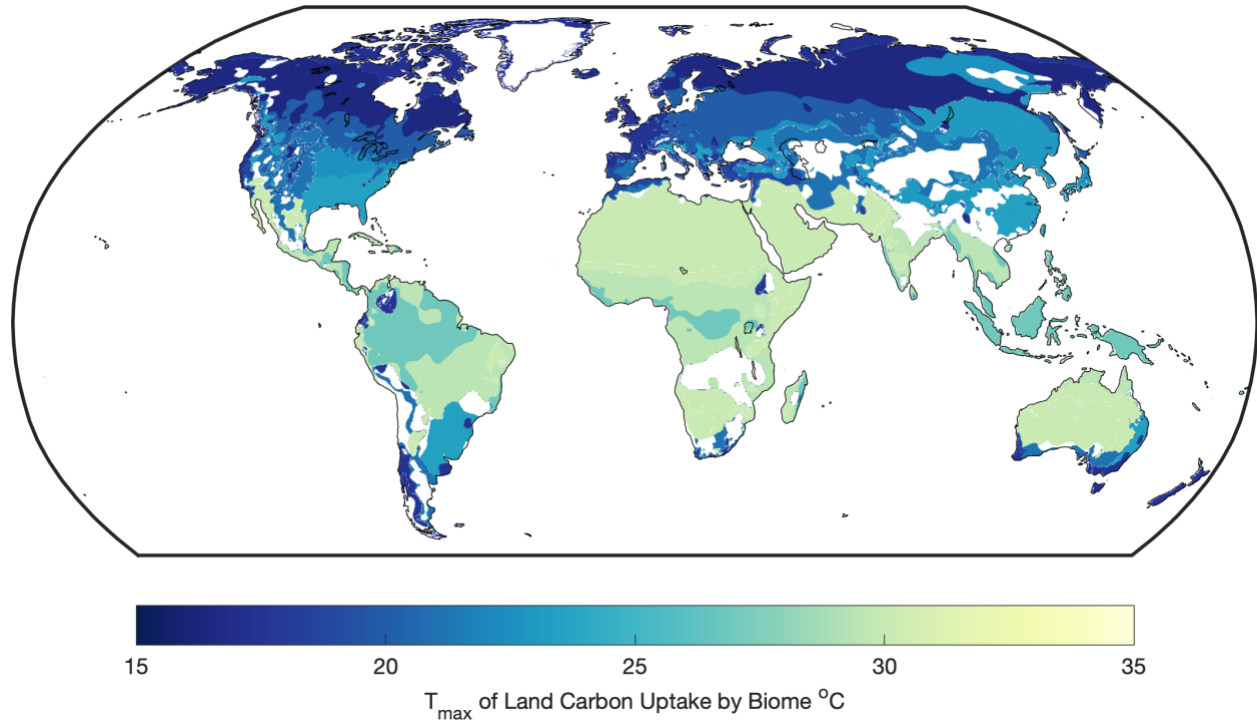

**Fig. S5 Gridded  $T_p^{\max}$  by Koeppen-Geiger Biome.** Gridded mean values of  $T_p^{\max}$  based on *in-situ* fit of MMRT at FLUXNET tower sites. White areas indicate no data.

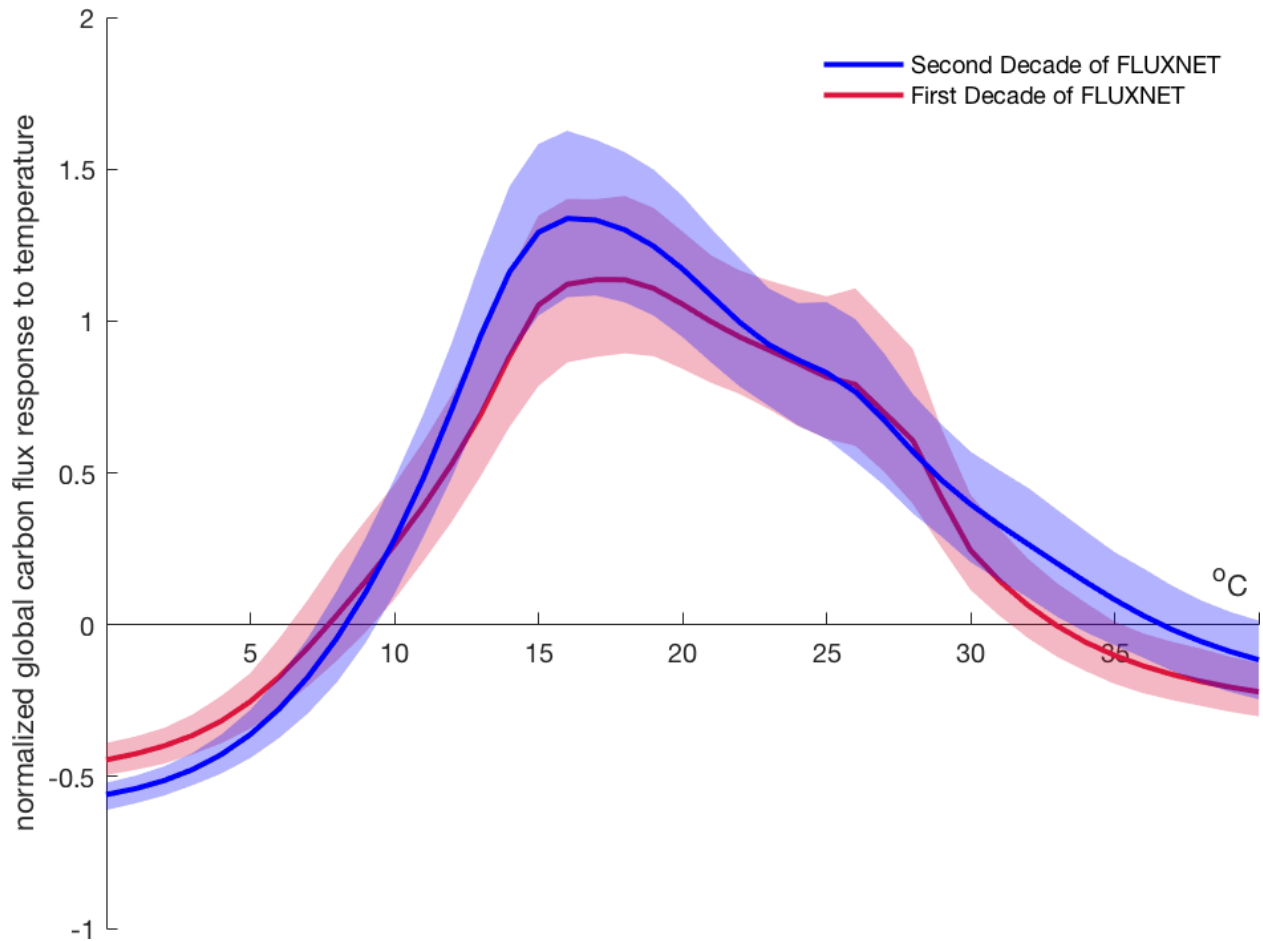

**Fig. S6 Temperature dependence of global photosynthesis separated by decade.** To check for evidence of acclimation in global photosynthesis FLUXNET 2015 synthesis data was filtered for sites which spanned both the first and second decade of the record. Observations were partitioned by decade and fit with MMRT (12) to evaluate whether the temperature dependence curve shifted given the warmest decade on record. As the 90% CI of both decades overlap, we see no evidence of an upward shift in  $T_p^{max}$ , and therefore no evidence of acclimation.

**Table S1.**

Total Ecosystem Respiration (TER) MMRT Parameters by FLUXNET site, with the number of daily estimates used for fitting MMRT (n).

| Site   | n    | MMRT Parameters             |                             |                         |
|--------|------|-----------------------------|-----------------------------|-------------------------|
|        |      | $\Delta H_{T_0}^{\ddagger}$ | $\Delta H_{T_0}^{\ddagger}$ | $\Delta C_P^{\ddagger}$ |
| AR-SLu | 468  | 11476.34611                 | -228.8013346                | -7738.572128            |
| AU-Cpr | 1468 | 39183.04499                 | -134.6414882                | -1953.878741            |
| AU-Cum | 703  | -5829.852816                | -288.596772                 | -3984.619958            |
| AU-DaP | 1931 | 18046.67935                 | -201.541278                 | -958.9153952            |
| AU-Emr | 884  | 19000.99485                 | -202.3518779                | -5490.615258            |
| AU-Gin | 980  | 11364.00323                 | -228.3540881                | -4242.449675            |
| AU-Rig | 1106 | 13178.5469                  | -223.8373382                | -5323.34855             |
| AU-Whr | 1005 | 41233.46262                 | -125.9287334                | -434.0584595            |
| CA-Obs | 3789 | -2380.85237                 | -219.1910905                | -4.237301745            |
| CA-Qfo | 2172 | -2344.643903                | -220.472327                 | -2.881020776            |
| CH-Dav | 4566 | -2342.242057                | -221.4438925                | -2.598638379            |
| DE-Tha | 5382 | -2382.256905                | -217.8701885                | -4.439051214            |
| ES-Amo | 1606 | -6368.014492                | -289.9651804                | -6020.044173            |
| ES-LJu | 3079 | 21555.01254                 | -195.5302912                | -4855.734628            |
| FR-Pue | 4119 | 25490.71558                 | -180.8827671                | -2500.307655            |
| GF-Guy | 3199 | -2499.5622                  | -239.4263311                | -28.85341941            |
| GH-Ank | 747  | -76163.10168                | -528.7871014                | -4872.047942            |
| IT-CA1 | 929  | 5932.226394                 | -247.8111433                | -4542.210066            |
| IT-CA2 | 824  | -2154.441887                | -277.9348695                | -4009.70695             |
| IT-CA3 | 829  | 8779.068662                 | -236.9539391                | -4980.852656            |
| IT-Ro1 | 2624 | 10461.55269                 | -230.6872988                | -3966.394906            |
| IT-Ro2 | 2995 | 13213.11592                 | -222.607422                 | -3916.260434            |
| JP-SMF | 1145 | -2383.894791                | -218.7078886                | -4.271561756            |
| RU-Cok | 1105 | -756.3685084                | -232.2896427                | 62.97654157             |
| SD-Dem | 846  | 62199.17023                 | -61.9100076                 | -2861.711991            |
| US-AR1 | 1165 | 33895.65906                 | -151.3274412                | -4615.717156            |
| US-ARM | 3124 | 47462.97983                 | -105.2136527                | -2569.293763            |
| US-Blo | 3016 | 55041.12622                 | -82.81742901                | -2877.012328            |
| US-Cop | 1140 | 41259.30584                 | -127.8981611                | -3001.83852             |
| US-GLE | 2617 | -2374.218655                | -221.2947969                | -3.821398704            |
| US-IB2 | 2063 | -2376.993018                | -218.8827493                | -4.208595455            |
| US-NR1 | 2725 | -2332.169843                | -223.7076887                | -1.852265464            |
| US-SRC | 2002 | 48380.92631                 | -105.4514333                | -2284.320943            |
| US-SRG | 2374 | 38150.01407                 | -139.1024744                | -1284.210105            |
| US-SRM | 3949 | 44118.47834                 | -119.4743473                | -1450.712642            |



|        |      |              |              |              |
|--------|------|--------------|--------------|--------------|
| US-Ton | 4523 | 34019.86353  | -153.2384802 | -2038.099675 |
| US-Var | 4776 | 40219.12899  | -130.7487378 | -1758.096452 |
| US-WPT | 876  | -2401.849156 | -215.4211068 | -5.210511803 |
| US-Whs | 2734 | 43124.15373  | -123.5344947 | -1959.321537 |
| US-Wi6 | 367  | -2446.187283 | -205.6769929 | -6.960438653 |
| US-Wkg | 3867 | 41164.93948  | -128.5421675 | -2569.552244 |
| ZM-Mon | 675  | 32022.08813  | -155.6471875 | -925.3577715 |

**Table S2.**

Photosynthesis MMRT Parameters by FLUXNET site, with the number of daily estimates used for fitting MMRT (n).

| Site   | n    | MMRT Parameters           |                    |                       |
|--------|------|---------------------------|--------------------|-----------------------|
|        |      | $\Delta H_{T_0}^\ddagger$ | $S_{T_0}^\ddagger$ | $\Delta C_p^\ddagger$ |
| AR-SLu | 468  | -2273538.635              | -8010.576515       | -270830.0511          |
| AR-Vir | 393  | -1510238.261              | -5431.210664       | -149929.8095          |
| AT-Neu | 3135 | -1032845.441              | -3835.414815       | -67813.44291          |
| AU-Ade | 558  | -217116.688               | -1002.352686       | -51532.40008          |
| AU-Cpr | 1468 | 184299.2191               | 338.1169569        | -79248.91997          |
| AU-Cum | 703  | -1211623.992              | -4431.457078       | -96083.87184          |
| AU-DaS | 2429 | -35640.96307              | -396.0605139       | -13203.25193          |
| AU-Dry | 1749 | 2995.897107               | -263.9260666       | -10500.44828          |
| AU-Emr | 884  | -40636.67719              | -409.984901        | -16403.79077          |
| AU-Gin | 980  | -183744.2938              | -896.8618252       | -47851.51662          |
| AU-How | 4125 | -46818.76232              | -429.3502542       | -13470.62504          |
| AU-RDF | 621  | -66475.509                | -494.8173485       | -23008.52595          |
| AU-Rig | 1106 | -143572.1352              | -764.9567094       | -14498.14286          |
| AU-Tum | 4115 | -2265625.298              | -8099.74917        | -144520.1401          |
| AU-Whr | 1005 | -3260800.757              | -11493.00585       | -226297.0634          |
| AU-Wom | 1161 | 1228297.313               | 4190.692262        | -167142.9185          |
| AU-Ync | 551  | -59370.80595              | -474.3367152       | -17299.46792          |
| BE-Bra | 4426 | -532578.5175              | -2113.133637       | -35855.01461          |
| BE-Lon | 3073 | -1694440.425              | -6107.676182       | -114861.8638          |
| BE-Vie | 5786 | -140160.156               | -754.5045382       | -16889.37953          |
| BR-Sa1 | 2578 | -3825346.715              | -13494.9974        | -228473.8923          |
| BR-Sa1 | 2578 | -3825346.715              | -13494.9974        | -228473.8923          |
| BR-Sa3 | 1317 | -258195.5723              | -1161.067601       | -27087.64333          |
| CA-Gro | 3234 | -867052.9448              | -3255.494507       | -65291.50094          |
| CA-NS2 | 1130 | -2790332.605              | -9915.760702       | -166471.3151          |
| CA-NS3 | 1424 | -859862.892               | -3231.215211       | -65287.35904          |
| CA-NS4 | 761  | -424721.3509              | -1730.424305       | -38132.83061          |
| CA-NS5 | 1250 | -4175515.646              | -14671.46189       | -268819.4968          |
| CA-NS7 | 1115 | -1654512.817              | -5992.517204       | -104614.5282          |
| CA-Oas | 4753 | -341547.6276              | -1442.960828       | -31916.62506          |
| CA-Obs | 3789 | -631769.5024              | -2447.510929       | -49551.37904          |
| CA-SF2 | 665  | -432329.9779              | -1765.394586       | -33119.09503          |
| CA-TP1 | 2520 | -546162.9045              | -2144.911124       | -45544.01364          |
| CA-TP4 | 3904 | -381332.7266              | -1589.130407       | -28880.864            |

|        |      |              |              |              |
|--------|------|--------------|--------------|--------------|
| CA-TPD | 952  | -487319.5956 | -1941.931372 | -41340.34995 |
| CH-Cha | 2462 | -444040.7521 | -1800.627554 | -32644.85481 |
| CH-Dav | 4566 | -3473265.646 | -12332.23387 | -182420.0338 |
| CH-Fru | 2352 | -3122220.17  | -11096.60814 | -168343.5722 |
| CH-Lae | 3256 | -411030.1347 | -1695.701732 | -28395.85993 |
| CH-Oe1 | 1494 | -425244.637  | -1730.255517 | -34200.46391 |
| CH-Oe2 | 2746 | -997783.8485 | -3709.282037 | -69365.26105 |
| CN-Cha | 917  | -656754.2633 | -2531.78468  | -52368.74036 |
| CN-Cng | 1120 | -693742.0765 | -2641.783386 | -75065.30392 |
| CN-Dan | 714  | -2788975.801 | -9948.492078 | -152072.1731 |
| CN-Din | 876  | 6.48467E+11  | -2254257921  | -46876657225 |
| CN-Qia | 910  | -124787.113  | -655.8498548 | -72005.08255 |
| CN-Sw2 | 378  | -1444428.048 | -5204.616751 | -150725.2759 |
| CZ-BK1 | 3437 | -244308.9501 | -1111.331559 | -21874.84565 |
| CZ-BK2 | 2001 | -525129.4772 | -2081.846794 | -37326.53679 |
| CZ-wet | 2483 | -621286.6561 | -2416.6195   | -42464.22919 |
| DE-Geb | 4296 | -238333.1678 | -1087.747937 | -24090.28652 |
| DE-Hai | 4214 | 1070.487616  | -266.5181182 | -6051.521186 |
| DE-Kli | 2889 | -150148.652  | -782.6496675 | -18266.23298 |
| DE-Lnf | 2531 | -2771315.276 | -9864.141606 | -160022.189  |
| DE-Obe | 2187 | -2714746.31  | -9688.374132 | -145920.7767 |
| DE-RuR | 786  | -807545.9351 | -3060.168005 | -53359.43361 |
| DE-RuS | 504  | -910817.9354 | -3409.093126 | -62629.00778 |
| DE-Seh | 617  | -2993783.284 | -10625.51344 | -174503.3842 |
| DE-SfN | 730  | -7441875.844 | -25868.80516 | -486597.6387 |
| DE-Spw | 1354 | -506916.6355 | -2014.259113 | -41035.36385 |
| DE-Tha | 5450 | -16995.53094 | -335.1462922 | -5519.117344 |
| DE-Zrk | 494  | -3991907.544 | -14141.49477 | -201639.6024 |
| DK-Sor | 5142 | -926298.2128 | -3465.527734 | -62779.47765 |
| DK-ZaH | 1884 | 6.38285E+14  | -2.29322E+12 | -2.35739E+13 |
| ES-LgS | 843  | -4443791.308 | -15518.00695 | -347140.9641 |
| FI-Hyy | 5413 | -684036.0203 | -2637.945028 | -45202.18217 |
| FI-Jok | 1025 | -2282018.533 | -8168.99047  | -130969.0996 |
| FI-Let | 964  | 750890.7272  | 3998.859268  | -767099.0108 |
| FI-Lom | 942  | -2936519.82  | -10471.0834  | -151495.3859 |
| FI-Sod | 4294 | -789511.4388 | -2997.304219 | -53798.00435 |
| FR-Fon | 2279 | -939211.0945 | -3509.607937 | -64070.49498 |
| FR-Gri | 2264 | -149719.8647 | -784.3192961 | -16783.37737 |
| FR-LBr | 2864 | -228176.6888 | -1052.660363 | -24761.69635 |
| FR-Pue | 4119 | -37665.24961 | -396.667364  | -11332.94291 |

|        |      |              |              |              |
|--------|------|--------------|--------------|--------------|
| GF-Guy | 3199 | -79519.29375 | -545.0677804 | -6689.093786 |
| IT-BCi | 2302 | -144924.8388 | -761.1918326 | -18968.35164 |
| IT-CA1 | 929  | -11272.04349 | -304.8565749 | -7467.628382 |
| IT-Col | 4420 | -97854.52302 | -608.0266808 | -13001.01033 |
| IT-Isp | 583  | -1030259.291 | -3815.843803 | -76946.95226 |
| IT-La2 | 518  | -5833276.123 | -20531.25046 | -298251.4544 |
| IT-Noe | 2808 | -772961.9805 | -2935.965249 | -55684.83046 |
| IT-Ren | 4645 | -4588641.445 | -16264.65854 | -217398.9812 |
| IT-SR2 | 582  | -1016956.872 | -3720.216697 | -93363.71444 |
| JP-MBF | 484  | -3268534.402 | -11672.89406 | -151304.4504 |
| MY-PSO | 2232 | -2150141.052 | -7680.743759 | -143979.2654 |
| NL-Loo | 4069 | -4389691.463 | -15417.30961 | -277270.0387 |
| PA-SPs | 988  | -1790892.122 | -6430.689282 | -125843.1749 |
| RU-Che | 547  | -4505352.304 | -15901.80438 | -236993.7283 |
| RU-Fyo | 4999 | -6251488.497 | -21881.09253 | -365795.7958 |
| RU-Sam | 1676 | -2724893368  | -9609804.715 | -127773067.1 |
| RU-SkP | 489  | -38968.98386 | -403.3757676 | -10133.87648 |
| RU-Tks | 1171 | -376595.5435 | -1413.135298 | -86014.78347 |
| SE-St1 | 427  | -2539710.211 | -9053.265976 | -147319.5836 |
| US-AR2 | 1081 | 24597.47445  | -183.5211875 | -8518.982573 |
| US-CRT | 745  | -523494.4285 | -2061.83204  | -44893.05501 |
| US-GBT | 548  | -12492269.33 | -43761.17626 | -641550.4679 |
| US-GLE | 2638 | -3141601.929 | -11127.0773  | -191942.2904 |
| US-Goo | 1471 | -249212.989  | -1119.008038 | -26182.79973 |
| US-Ha1 | 6621 | -341200.7299 | -1447.018876 | -27384.50022 |
| US-IB2 | 2063 | -254165.5041 | -1141.297299 | -24879.9864  |
| US-Ivo | 1043 | -6135737.638 | -21563.44602 | -317926.7817 |
| US-Lin | 377  | -114688.5582 | 505.6638443  | -383544.8653 |
| US-MMS | 5294 | -36684.7626  | -392.8099496 | -11144.68989 |
| US-Me3 | 1739 | 23633.07145  | -191.0863811 | -9286.710654 |
| US-Me5 | 846  | -1296953.83  | -4664.544355 | -203195.7191 |
| US-Me6 | 1285 | 501059.4352  | 1662.659117  | -871089.8098 |
| US-Myb | 1078 | -7558945.49  | -26327.14141 | -482848.1534 |
| US-NR1 | 4843 | -818464.5315 | -3097.872315 | -59645.51922 |
| US-Ne2 | 3217 | -281060.9891 | -1230.173152 | -28282.90234 |
| US-Ne3 | 3518 | -82751.04036 | -550.8578229 | -13545.97482 |
| US-Oho | 2894 | -368942.7372 | -1539.262289 | -30409.82854 |
| US-PFa | 5768 | -747872.5367 | -2852.890729 | -51101.81981 |
| US-Prr | 1316 | -2813184.011 | -9997.862251 | -168555.5612 |
| US-SRC | 2002 | -90986.25998 | -582.4290696 | -45426.16196 |
| US-Sta | 712  | 23581.19457  | -188.6963305 | -9385.860591 |

|        |      |              |              |              |
|--------|------|--------------|--------------|--------------|
| US-Syv | 2183 | -3769115.01  | -13290.73995 | -228532.6964 |
| US-Tw3 | 389  | -195255.4947 | -933.6799892 | -29347.13164 |
| US-Twt | 1215 | -341218.776  | -1443.047273 | -36578.41133 |
| US-UMd | 2490 | -49785.91907 | -435.8150613 | -13071.39041 |
| US-WCr | 3689 | -1401270.013 | -5119.214825 | -83322.13449 |
| US-WPT | 876  | -299351.6623 | -1299.61747  | -26735.29015 |
| US-Whs | 2734 | 6311.813125  | -249.5863143 | -12978.11558 |
| US-Wi3 | 396  | -616290.5616 | -2386.004728 | -50848.80558 |
| ZA-Kru | 3646 | -77791.50977 | -535.2890349 | -13491.13625 |

**Table S3.**

FLUXNET sites and years used in this analysis, along with relevant reference paper, DOI and funding acknowledgement.

| <b>Site ID</b> | <b>Years of Data Used</b> | <b>Reference Paper</b>                                                                                                                                                                                                                                                                            | <b>DOI</b> | <b>Funding Acknowledgement</b> |
|----------------|---------------------------|---------------------------------------------------------------------------------------------------------------------------------------------------------------------------------------------------------------------------------------------------------------------------------------------------|------------|--------------------------------|
| 'AR-SLu'       | '2009-2011'               | Ulke, A. G., Gattinoni, N. N. and Posse, G.: Analysis and modelling of turbulent fluxes in two different ecosystems in Argentina, <i>Int. J. Environ. Pollut.</i> , 58(1-2), 52–62, 2015.                                                                                                         | -          | -                              |
| 'AR-Vir'       | '2009-2012'               | Posse, G., Lewczuk, N., Richter, K. and Cristiano, P.: Carbon and water vapor balance in a subtropical pine plantation, <i>iForest</i> , 9(5), 736–742, 2016.                                                                                                                                     | -          | -                              |
| 'AT-Neu'       | '2002-2012'               | Wohlfahrt, G., Hammerle, A., Haslwanger, A., Bahn, M., Tappeiner, U. and Cernusca, A.: Seasonal and inter-annual variability of the net ecosystem CO <sub>2</sub> exchange of a temperate mountain grassland: Effects of weather and management, <i>J. Geophys. Res.</i> , 113(D8), D08110, 2008. | -          | -                              |
| 'AU-ASM'       | '2010-2014'               | Cleverly, J., Boulain, N., Villalobos-Vega, R., Grant, N., Faux, R., Wood, C., Cook, P. G., Yu, Q., Leigh, A. and Eamus, D.: Dynamics of component carbon fluxes in a semi-arid Acacia woodland, central Australia, <i>J. Geophys. Res. Biogeosci.</i> , 118(3), 1168–1185, 2013.                 | -          | -                              |

|          |             |                                                                                                                                                                                                                                                                                                                                                                                                                                                                                                   |   |   |
|----------|-------------|---------------------------------------------------------------------------------------------------------------------------------------------------------------------------------------------------------------------------------------------------------------------------------------------------------------------------------------------------------------------------------------------------------------------------------------------------------------------------------------------------|---|---|
| 'AU-Ade' | '2007-2009' | Beringer, J., Hacker, J., Hutley, L. B., Leuning, R., Arndt, S. K., Amiri, R., Bannehr, L., Cernusak, L., Grover, S., Hensley, C., Hocking, D., Isaac, P., Jamali, H., Kanniah, K., Livesley, S., Neiningner, B., Tha Paw U, K., Sea, W., Straten, D., Tapper, N., Weinmann, R., Wood, S. and Zegelin, S.: SPECIAL—Savanna Patterns of Energy and Carbon Integrated across the Landscape, Bull. Am. Meteorol. Soc., 92(11), 1467–1485, 2011b.                                                     | - | - |
| 'AU-Cpr' | '2010-2014' | Meyer, W. S., Kondrlovà, E. and Koerber, G. R.: Evaporation of perennial semi-arid woodland in southeastern Australia is adapted for irregular but common dry periods, Hydrol. Process., 29(17), 3714–3726, 2015.                                                                                                                                                                                                                                                                                 | - | - |
| 'AU-Cum' | '2012-2014' | Beringer, J., Hutley, L. B., McHugh, I., Arndt, S. K., Campbell, D., Cleugh, H. A., Cleverly, J., Resco de Dios, V., Eamus, D., Evans, B., Ewenz, C., Grace, P., Griebel, A., Haverd, V., Hinko-Najera, N., Huete, A., Isaac, P., Kanniah, K., Leuning, R., Liddell, M. J., Macfarlane, C., Meyer, W., Moore, C., Pendall, E., Phillips, A., Phillips, R. L., Prober, S. M., Restrepo-Coupe, N., Rutledge, S., Schroder, I., Silberstein, R., Southall, P., Yee, M. S., Tapper, N. J., Gorsel, E. | - | - |

|          |             |                                                                                                                                                                                                                                                                          |   |   |
|----------|-------------|--------------------------------------------------------------------------------------------------------------------------------------------------------------------------------------------------------------------------------------------------------------------------|---|---|
|          |             | van, Vote, C., Walker, J. and                                                                                                                                                                                                                                            |   |   |
| 'AU-DaP' | '2007-2013' | Beringer, J., Hutley, L. B., Hacker, J. M., Neiningen, B. and Paw U, K. T.: Patterns and processes of carbon, water and energy cycles across northern Australian landscapes: From point to region, <i>Agric. For. Meteorol.</i> , 151(11), 1409–1416, 2011a.             | - | - |
| 'AU-DaS' | '2008-2014' | Hutley, L. B., Beringer, J., Isaac, P. R., Hacker, J. M. and Cernusak, L. A.: A sub-continental scale living laboratory: Spatial patterns of savanna vegetation over a rainfall gradient in northern Australia, <i>Agric. For. Meteorol.</i> , 151(11), 1417–1428, 2011. | - | - |
| 'AU-Dry' | '2008-2014' | Cernusak, L. A., Hutley, L. B., Beringer, J., Holtum, J. A. M. and Turner, B. L.: Photosynthetic physiology of eucalypts along a sub-continental rainfall gradient in northern Australia, <i>Agric. For. Meteorol.</i> , 151(11), 1462–1470, 2011.                       | - | - |
| 'AU-Emr' | '2011-2013' | Schroder, I., Kuske, T. and Zegelin, S.: Eddy Covariance Dataset for Arcturus (2011-2013), Geoscience Australia, Canberra, doi:10.26181/14249, 2014.                                                                                                                     | - | - |



|          |             |                                                                                                                                                                                                                                                                                                        |   |   |
|----------|-------------|--------------------------------------------------------------------------------------------------------------------------------------------------------------------------------------------------------------------------------------------------------------------------------------------------------|---|---|
| 'AU-Fog' | '2006-2008' | Beringer, J., Livesley, S. J., Randle, J. and Hutley, L. B.: Carbon dioxide fluxes dominate the greenhouse gas exchanges of a seasonal wetland in the wet-dry tropics of northern Australia, <i>Agric. For. Meteorol.</i> , 182–183, 239–247, 2013.                                                    | - | - |
| 'AU-How' | '2001-2014' | Beringer, J., Hutley, L. B., Tapper, N. J. and Cernusak, L. A.: Savanna fires and their impact on net ecosystem productivity in North Australia, <i>Glob. Chang. Biol.</i> , 13(5), 990–1004, 2007.                                                                                                    | - | - |
| 'AU-Lox' | '2008-2009' | Stevens, R. M., Ewenz, C. M., Grigson, G. and Conner, S. M.: Water use by an irrigated almond orchard, <i>Irrig. Sci.</i> , 30(3), 189–200, 2012.                                                                                                                                                      | - | - |
| 'AU-RDF' | '2011-2013' | Bristow, M., Hutley, L. B., Beringer, J., Livesley, S. J., Edwards, A. C. and Arndt, S. K.: Quantifying the relative importance of greenhouse gas emissions from current and future savanna land use change across northern Australia, <i>Biogeosciences</i> , 13(22), 6285–6303, 2016.                | - | - |
| 'AU-Rig' | '2011-2014' | Beringer, J., Hutley, L. B., McHugh, I., Arndt, S. K., Campbell, D., Cleugh, H. A., Cleverly, J., Resco de Dios, V., Eamus, D., Evans, B., Ewenz, C., Grace, P., Griebel, A., Haverd, V., Hinko-Najera, N., Huete, A., Isaac, P., Kanniah, K., Leuning, R., Liddell, M. J., Macfarlane, C., Meyer, W., | - | - |

|          |             |                                                                                                                                                                                                                                                                                                                                                                                                                                                                                                                                 |   |   |
|----------|-------------|---------------------------------------------------------------------------------------------------------------------------------------------------------------------------------------------------------------------------------------------------------------------------------------------------------------------------------------------------------------------------------------------------------------------------------------------------------------------------------------------------------------------------------|---|---|
|          |             | Moore, C., Pendall, E., Phillips, A., Phillips, R. L., Prober, S. M., Restrepo-Coupe, N., Rutledge, S., Schroder, I., Silberstein, R., Southall, P., Yee, M. S., Tapper, N. J., Gorsel, E. van, Vote, C., Walker, J. and                                                                                                                                                                                                                                                                                                        |   |   |
| 'AU-Rob' | '2014-2014' | Beringer, J., Hutley, L. B., McHugh, I., Arndt, S. K., Campbell, D., Cleugh, H. A., Cleverly, J., Resco de Dios, V., Eamus, D., Evans, B., Ewenz, C., Grace, P., Griebel, A., Haverd, V., Hinko-Najera, N., Huete, A., Isaac, P., Kanniah, K., Leuning, R., Liddell, M. J., Macfarlane, C., Meyer, W., Moore, C., Pendall, E., Phillips, A., Phillips, R. L., Prober, S. M., Restrepo-Coupe, N., Rutledge, S., Schroder, I., Silberstein, R., Southall, P., Yee, M. S., Tapper, N. J., Gorsel, E. van, Vote, C., Walker, J. and | - | - |
| 'AU-Stp' | '2008-2014' | Beringer, J., Hutley, L. B., Hacker, J. M., Neining, B. and Paw U, K. T.: Patterns and processes of carbon, water and energy cycles across northern Australian landscapes: From point to region, Agric. For. Meteorol., 151(11), 1409–1416, 2011a.                                                                                                                                                                                                                                                                              | - | - |
| 'AU-Tum' | '2001-2014' | Leuning, R., Cleugh, H. A., Zegelin, S. J. and Hughes, D.: Carbon and water fluxes over a temperate Eucalyptus forest and a tropical wet/dry savanna in Australia: measurements                                                                                                                                                                                                                                                                                                                                                 | - | - |

|          |             |                                                                                                                                                                                                                                                                           |                                  |                                         |
|----------|-------------|---------------------------------------------------------------------------------------------------------------------------------------------------------------------------------------------------------------------------------------------------------------------------|----------------------------------|-----------------------------------------|
|          |             | and comparison with MODIS remote sensing estimates, <i>Agric. For. Meteorol.</i> , 129(3–4), 151–173, 2005.                                                                                                                                                               |                                  |                                         |
| 'AU-Wac' | '2005-2008' | Kilinc, M., Beringer, J., Hutley, L. B., Tapper, N. J. and McGuire, D. A.: Carbon and water exchange of the world's tallest angiosperm forest, <i>Agric. For. Meteorol.</i> , 182–183, 215–224, 2013.                                                                     | -                                | -                                       |
| 'AU-Whr' | '2011-2014' | McHugh, I. D., Beringer, J., Cunningham, S. C., Baker, P. J., Cavagnaro, T. R., Mac Nally, R. and Thompson, R. M.: Interactions between nocturnal turbulent flux, storage and advection at an “ideal” eucalypt woodland site, <i>Biogeoscience</i> , 14, 3027-3050, 2017. | -                                | -                                       |
| 'AU-Ync' | '2012-2014' | Yee, M. S., Pauwels, V. R. N., Daly, E., Beringer, J., Rüdiger, C., McCabe, M. F. and Walker, J. P.: A comparison of optical and microwave scintillometers with eddy covariance derived surface heat fluxes, <i>Agric. For. Meteorol.</i> , 213, 226–239, 2015.           | -                                | -                                       |
| 'BE-Bra' | '1996-2014' | Carrara, A., Janssens, I. A., Curiel Yuste, J. and Ceulemans, R.: Seasonal changes in photosynthesis, respiration and NEE of a mixed temperate forest, <i>Agric. For. Meteorol.</i> , 126(1–2), 15–31, 2004.                                                              | -                                | -                                       |
| 'BE-Lon' | '2004-2014' | Moureaux, C., Debacq, A., Bodson, B., Heinesch, B. and Aubinet, M.: Annual net ecosystem carbon exchange by a sugar beet                                                                                                                                                  | 10.1016/j.agrform et.2006.05.009 | Supported by Service Public de Wallonie |

|          |             |                                                                                                                                                                                                                                                                                                                                                                                                      |                                  |                                                                                                                                                  |
|----------|-------------|------------------------------------------------------------------------------------------------------------------------------------------------------------------------------------------------------------------------------------------------------------------------------------------------------------------------------------------------------------------------------------------------------|----------------------------------|--------------------------------------------------------------------------------------------------------------------------------------------------|
|          |             | crop, Agric. For. Meteorol., 139(1-2), 25-39, 2006.                                                                                                                                                                                                                                                                                                                                                  |                                  |                                                                                                                                                  |
| 'BE-Vie' | '1996-2014' | Aubinet, M., Chermanne, B., Vandenhoute, M., Longdoz, B., Yernaux, M. and Laitat, E.: Long term carbon dioxide exchange above a mixed forest in the Belgian Ardennes, Agric. For. Meteorol., 108(4), 293-315, 2001.                                                                                                                                                                                  | 10.1016/s0168-1923(01)00244-1    | Supported by Service Public de Wallonie                                                                                                          |
| 'BR-Sal' | '2002-2011' | Baker, T. R., Phillips, O. L., Malhi, Y., Almeida, S., Arroyo, L., Di Fiore, A., Erwin, T., Killeen, T. J., Laurance, S. G., Laurance, W. F., Lewis, S. L., Lloyd, J., Monteagudo, A., Neill, D. A., Patino, S., Pitman, N. C., M. Silva, J. N., Vasquez Martinez, R. (2004) Variation In Wood Density Determines Spatial Patterns Inamazonian Forest Biomass, Global Change Biology, 10(5), 545-562 | 10.1111/j.1365-2486.2004.00751.x | -                                                                                                                                                |
| 'BR-Sa3' | '2000-2004' | Asner, G. P., Keller, M., Pereira, Jr, R., Zweede, J. C., Silva, J. N. (2004) Canopy Damage And Recovery After Selective Logging In Amazonia: Field And Satellite Studies, Ecological Applications, 14(sp4), 280-298                                                                                                                                                                                 | 10.1890/01-6019                  | -                                                                                                                                                |
| 'CA-Gro' | '2003-2014' | Chen, J. M., Govind, A., Sonnentag, O., Zhang, Y., Barr, A., Amiro, B. (2006) Leaf Area Index Measurements At Fluxnet-Canada Forest Sites, Agricultural And Forest Meteorology, 140(1-4), 257-268                                                                                                                                                                                                    | 10.1016/j.agrformet.2006.08.005  | We acknowledge the PI and the principal funders of the Groundhog River Flux Station for the provision of flux data plus ancillary meteorological |

|          |             |                                                                                                                                                                                                                          |                                 |                                                     |
|----------|-------------|--------------------------------------------------------------------------------------------------------------------------------------------------------------------------------------------------------------------------|---------------------------------|-----------------------------------------------------|
|          |             |                                                                                                                                                                                                                          |                                 | and ecological data from this mixedwood boreal site |
| 'CA-NS1' | '2001-2005' | Dennis Baldocchi, Cove Sturtevant (2015) Does day and night sampling reduce spurious correlation between canopy photosynthesis and ecosystem respiration?, <i>Agricultural and Forest Meteorology</i> , 207(11), 117-126 | 10.1016/j.agrformet.2015.03.010 | -                                                   |
| 'CA-NS2' | '2001-2005' | Bond-Lamberty, B., Wang, C., Gower, S. T. (2004) Net Primary Production And Net Ecosystem Production Of A Boreal Black Spruce Wildfire Chronosequence, <i>Global Change Biology</i> , 10(4), 473-487                     | 10.1111/j.1529-8817.2003.0742.x | -                                                   |
| 'CA-NS3' | '2001-2005' | Bond-Lamberty, B., Wang, C., Gower, S. T. (2004) Net Primary Production And Net Ecosystem Production Of A Boreal Black Spruce Wildfire Chronosequence, <i>Global Change Biology</i> , 10(4), 473-487                     | 10.1111/j.1529-8817.2003.0742.x | -                                                   |
| 'CA-NS5' | '2001-2005' | Bond-Lamberty, B., Wang, C., Gower, S. T. (2004) Net Primary Production And Net Ecosystem Production Of A Boreal Black Spruce Wildfire Chronosequence, <i>Global Change Biology</i> , 10(4), 473-487                     | 10.1111/j.1529-8817.2003.0742.x | -                                                   |
| 'CA-NS6' | '2001-2005' | Bond-Lamberty, B., Wang, C., Gower, S. T. (2004) Net Primary Production And Net Ecosystem Production Of A Boreal Black Spruce Wildfire Chronosequence,                                                                   | 10.1111/j.1529-8817.2003.0742.x | -                                                   |

|          |             |                                                                                                                                                                                                                                                                  |                                  |   |
|----------|-------------|------------------------------------------------------------------------------------------------------------------------------------------------------------------------------------------------------------------------------------------------------------------|----------------------------------|---|
|          |             | Global Change Biology, 10(4), 473-487                                                                                                                                                                                                                            |                                  |   |
| 'CA-NS7' | '2002-2005' | Bond-Lamberty, B., Wang, C., Gower, S. T. (2004) Net Primary Production And Net Ecosystem Production Of A Boreal Black Spruce Wildfire Chronosequence, Global Change Biology, 10(4), 473-487                                                                     | 10.1111/j.1529-8817.2003.0742.x  | - |
| 'CA-Oas' | '1996-2010' | Barr, A. G., Black, T., Hogg, E., Kljun, N., Morgenstern, K., Nesic, Z. (2004) Inter-Annual Variability In The Leaf Area Index Of A Boreal Aspen-Hazelnut Forest In Relation To Net Ecosystem Production, Agricultural And Forest Meteorology, 126(3-4), 237-255 | 10.1016/j.agrformet.2004.06.011  | - |
| 'CA-Obs' | '1997-2010' | Bergeron, O., Margolis, H. A., Black, T. A., Coursolle, C., Dunn, A. L., Barr, A. G., Wofsy, S. C. (2007) Comparison Of Carbon Dioxide Fluxes Over Three Boreal Black Spruce Forests In Canada, Global Change Biology, 13(1), 89-107                             | 10.1111/j.1365-2486.2006.01281.x | - |
| 'CA-Qfo' | '2003-2010' | Bergeron, O., Margolis, H. A., Black, T. A., Coursolle, C., Dunn, A. L., Barr, A. G., Wofsy, S. C. (2007) Comparison Of Carbon Dioxide Fluxes Over Three Boreal Black Spruce Forests In Canada, Global Change Biology, 13(1), 89-107                             | 10.1111/j.1365-2486.2006.01281.x | - |

|          |             |                                                                                                                                        |                               |                                                                                                                                                                                                                                                                                                                                                                                                                                                                               |
|----------|-------------|----------------------------------------------------------------------------------------------------------------------------------------|-------------------------------|-------------------------------------------------------------------------------------------------------------------------------------------------------------------------------------------------------------------------------------------------------------------------------------------------------------------------------------------------------------------------------------------------------------------------------------------------------------------------------|
| 'CA-SF1' | '2003-2006' | Amiro, B. (2009) Measuring Boreal Forest Evapotranspiration Using The Energy Balance Residual, Journal Of Hydrology, 366(1-4), 112-118 | 10.1016/j.jhydrol.2008.12.021 | The data collection was funded by the Canadian Forest Service (Natural Resources Canada) and by Parks Canada as part of the BERMS (Boreal Ecosystem Research and Monitoring Sites) initiative in collaboration with the Fluxnet Canada Research Network and the Canadian Carbon Program (supported by the Canadian National Science and Engineering Research Council (NSERC), the Canadian Foundation for Climate and Atmospheric Sciences and the BIOCAP Canada Foundation). |
| 'CA-SF2' | '2001-2005' | Amiro, B. (2009) Measuring Boreal Forest Evapotranspiration Using The Energy Balance Residual, Journal Of Hydrology, 366(1-4), 112-118 | 10.1016/j.jhydrol.2008.12.021 | The data collection was funded by the Canadian Forest Service (Natural Resources Canada) and by Parks Canada as part of the BERMS (Boreal Ecosystem Research and Monitoring Sites)                                                                                                                                                                                                                                                                                            |

|          |             |                                                                                                                                               |                                      |                                                                                                                                                                                                                                                                                                                                                                                          |
|----------|-------------|-----------------------------------------------------------------------------------------------------------------------------------------------|--------------------------------------|------------------------------------------------------------------------------------------------------------------------------------------------------------------------------------------------------------------------------------------------------------------------------------------------------------------------------------------------------------------------------------------|
|          |             |                                                                                                                                               |                                      | <p>initiative in collaboration with the Fluxnet Canada Research Network and the Canadian Carbon Program (supported by the Canadian National Science and Engineering Research Council (NSERC), the Canadian Foundation for Climate and Atmospheric Sciences and the BIOCAP Canada Foundation).</p>                                                                                        |
| 'CA-SF3' | '2001-2006' | <p>Amiro, B. (2009) Measuring Boreal Forest Evapotranspiration Using The Energy Balance Residual, Journal Of Hydrology, 366(1-4), 112-118</p> | <p>10.1016/j.jhydrol.2008.12.021</p> | <p>The data collection was funded by the Canadian Forest Service (Natural Resources Canada) and by Parks Canada as part of the BERMS (Boreal Ecosystem Research and Monitoring Sites) initiative in collaboration with the Fluxnet Canada Research Network and the Canadian Carbon Program (supported by the Canadian National Science and Engineering Research Council (NSERC), the</p> |



|          |             |                                                                                                                                                                                                                                      |                                  |                                                                                             |
|----------|-------------|--------------------------------------------------------------------------------------------------------------------------------------------------------------------------------------------------------------------------------------|----------------------------------|---------------------------------------------------------------------------------------------|
|          |             |                                                                                                                                                                                                                                      |                                  | Canadian Foundation for Climate and Atmospheric Sciences and the BIOCAP Canada Foundation). |
| 'CA-TP1' | '2002-2014' | Arain, M. A., Restrepo-Coupe, N. (2005) Net Ecosystem Production In A Temperate Pine Plantation In Southeastern Canada, Agricultural And Forest Meteorology, 128(3-4), 223-241                                                       | 10.1016/j.agrform et.2004.10.003 | -                                                                                           |
| 'CA-TP2' | '2002-2007' | Arain, M. A., Restrepo-Coupe, N. (2005) Net Ecosystem Production In A Temperate Pine Plantation In Southeastern Canada, Agricultural And Forest Meteorology, 128(3-4), 223-241                                                       | 10.1016/j.agrform et.2004.10.003 | -                                                                                           |
| 'CA-TP4' | '2002-2014' | Arain, M. A., Restrepo-Coupe, N. (2005) Net Ecosystem Production In A Temperate Pine Plantation In Southeastern Canada, Agricultural And Forest Meteorology, 128(3-4), 223-241                                                       | 10.1016/j.agrform et.2004.10.003 | -                                                                                           |
| 'CG-Tch' | '2006-2009' | Merbold, L., Ardö, J., Arneth, A., Scholes, R. J., Nouvellon, Y., Grandcourt, A. de, Archibald, S., Bonnefond, J. M., Boulain, N., Brueggemann, N., Bruemmer, C., Cappelaere, B., Ceschia, E., El-Khidir, H. A. M., El-Tahir, B. A., | -                                | -                                                                                           |

|              |             |                                                                                                                                                                                                                                                                                            |   |   |
|--------------|-------------|--------------------------------------------------------------------------------------------------------------------------------------------------------------------------------------------------------------------------------------------------------------------------------------------|---|---|
|              |             | Falk, U., Lloyd, J., Kergoat, L., Dantec, V. L., Mougin, E., Muchinda, M., Mukelabai, M. M., Ramier, D., Roupsard, O., Timouk, F., Veenendaal, E. M. and Kutsch, W. L.: Precipitation as driver of carbon fluxes in 11 African ecosystems, <i>Biogeosciences</i> , 6(6), 1027–1041, 2009b. |   |   |
| 'CH-<br>Cha' | '2005-2014' | Merbold, L., Eugster, W., Stieger, J., Zahniser, M., Nelson, D. and Buchmann, N.: Greenhouse gas budget (CO <sub>2</sub> , CH <sub>4</sub> and N <sub>2</sub> O) of intensively managed grassland following restoration, <i>Glob. Chang. Biol.</i> , 20(6), 1913–1928, 2014.               | - | - |
| 'CH-<br>Dav' | '1997-2014' | Zielis, S., Etzold, S., Zweifel, R., Eugster, W., Haeni, M. and Buchmann, N.: NEP of a Swiss subalpine forest is significantly driven not only by current but also by previous year's weather, <i>Biogeosciences</i> , 11(6), 1627–1635, 2014.                                             | - | - |
| 'CH-<br>Fru' | '2005-2014' | Imer, D., Merbold, L., Eugster, W. and Buchmann, N.: Temporal and spatial variations of soil CO <sub>2</sub> , CH <sub>4</sub> and N <sub>2</sub> O fluxes at three differently managed grasslands, <i>Biogeosciences</i> , 10(9), 5931–5945, 2013.                                        | - | - |
| 'CH-<br>Lae' | '2004-2014' | Etzold, S., Ruehr, N. K., Zweifel, R., Dobbertin, M., Zingg, A., Pluess, P., Häslar, R., Eugster, W. and Buchmann, N.: The Carbon Balance of Two Contrasting Mountain                                                                                                                      | - | - |

|          |             |                                                                                                                                                                                                                                                   |   |   |
|----------|-------------|---------------------------------------------------------------------------------------------------------------------------------------------------------------------------------------------------------------------------------------------------|---|---|
|          |             | Forest Ecosystems in Switzerland: Similar Annual Trends, but Seasonal Differences, <i>Ecosystems</i> , 14(8), 1289–1309, 2011.                                                                                                                    |   |   |
| 'CH-Oe1' | '2002-2008' | Ammann, C., Spirig, C., Leifeld, J. and Neftel, A.: Assessment of the nitrogen and carbon budget of two managed temperate grassland fields, <i>Agric. Ecosyst. Environ.</i> , 133(3–4), 150–162, 2009.                                            | - | - |
| 'CH-Oe2' | '2004-2014' | Dietiker, D., Buchmann, N. and Eugster, W.: Testing the ability of the DNDC model to predict CO <sub>2</sub> and water vapour fluxes of a Swiss cropland site, <i>Agric. Ecosyst. Environ.</i> , 139(3), 396–401, 2010.                           | - | - |
| 'CN-Cha' | '2003-2005' | Guan, D.-X., Wu, J.-B., Zhao, X.-S., Han, S.-J., Yu, G.-R., Sun, X.-M. and Jin, C.-J.: CO <sub>2</sub> fluxes over an old, temperate mixed forest in northeastern China, <i>Agric. For. Meteorol.</i> , 137(3–4), 138–149, 2006.                  | - | - |
| 'CN-Dan' | '2004-2005' | Shi, P., Sun, X., Xu, L., Zhang, X., He, Y., Zhang, D. and Yu, G.: Net ecosystem CO <sub>2</sub> exchange and controlling factors in a steppe—Kobresia meadow on the Tibetan Plateau, <i>Sci. China Ser. D Earth Sci.</i> , 49(2), 207–218, 2006. | - | - |
| 'CN-Du2' | '2006-2008' | Chen, S., Chen, J., Lin, G., Zhang, W., Miao, H., Wei, L., Huang, J. and Han, X.: Energy balance and partition in Inner Mongolia steppe ecosystems with different land use types,                                                                 | - | - |

|          |             |                                                                                                                                                                                                                                                                                                |   |   |
|----------|-------------|------------------------------------------------------------------------------------------------------------------------------------------------------------------------------------------------------------------------------------------------------------------------------------------------|---|---|
|          |             | Agric. For. Meteorol., 149(11), 1800–1809, 2009.                                                                                                                                                                                                                                               |   |   |
| 'CN-HaM' | '2002-2004' | Kato, T., Tang, Y., Gu, S., Hirota, M., Du, M., Li, Y. and Zhao, X.: Temperature and biomass influences on interannual changes in CO <sub>2</sub> exchange in an alpine meadow on the Qinghai-Tibetan Plateau, Glob. Chang. Biol., 12(7), 1285–1298, 2006.                                     | - | - |
| 'CZ-BK1' | '2004-2014' | Acosta, M., Pavelka, M., Montagnani, L., Kutsch, W., Lindroth, A., Juszczak, R. and Janouš, D.: Soil surface CO <sub>2</sub> efflux measurements in Norway spruce forests: Comparison between four different sites across Europe — from boreal to alpine forest, Geoderma, 192, 295–303, 2013. | - | - |
| 'CZ-wet' | '2006-2014' | Dušek, J., Cížková, H., Stellner, S., Czerný, R. and Kvet, J.: Fluctuating water table affects gross ecosystem production and gross radiation use efficiency in a sedge-grass marsh, Hydrobiologia, 692(1), 57–66, 2012.                                                                       | - | - |
| 'DE-Geb' | '2001-2014' | Anthoni, P. M., Knohl, A., Rebmann, C., Freibauer, A., Mund, M., Ziegler, W., Kolle, O. and Schulze, E.-D.: Forest and agricultural land-use-dependent CO <sub>2</sub> exchange in Thuringia, Germany, Glob. Chang. Biol., 10(12), 2005–2019, 2004.                                            | - | - |

|          |             |                                                                                                                                                                                                                                                             |   |   |
|----------|-------------|-------------------------------------------------------------------------------------------------------------------------------------------------------------------------------------------------------------------------------------------------------------|---|---|
| 'DE-Gri' | '2004-2014' | Prescher, A.-K., Grünwald, T., Bernhofer, C., 2010: Land use regulates carbon budgets in eastern Germany: From NEE to NBP. <i>Agricultural and Forest Meteorology</i> , 150, 1016-1025.                                                                     | - | - |
| 'DE-Hai' | '2000-2012' | Knohl, A., Schulze, E.-D., Kolle, O. and Buchmann, N.: Large carbon uptake by an unmanaged 250-year-old deciduous forest in Central Germany, <i>Agric. For. Meteorol.</i> , 118(3-4), 151-167, 2003.                                                        | - | - |
| 'DE-Kli' | '2004-2014' | Prescher, A.-K., Grünwald, T., Bernhofer, C., 2010: Land use regulates carbon budgets in eastern Germany: From NEE to NBP. <i>Agricultural and Forest Meteorology</i> , 150, 1016-1025.                                                                     | - | - |
| 'DE-Lkb' | '2009-2013' | Lindauer, M., Schmid, H. P., Grote, R., Mauder, M., Steinbrecher, R. and Wolpert, B.: Net ecosystem exchange over a non-cleared wind-throw-disturbed upland spruce forest—Measurements and simulations, <i>Agric. For. Meteorol.</i> , 197, 219-234, 2014.  | - | - |
| 'DE-Lnf' | '2002-2012' | Anthoni, P. M., Knohl, A., Rebmann, C., Freibauer, A., Mund, M., Ziegler, W., Kolle, O. and Schulze, E.-D.: Forest and agricultural land-use-dependent CO <sub>2</sub> exchange in Thuringia, Germany, <i>Glob. Chang. Biol.</i> , 10(12), 2005-2019, 2004. | - | - |

|          |             |                                                                                                                                                                                                                                                                |                                                                                                         |                               |
|----------|-------------|----------------------------------------------------------------------------------------------------------------------------------------------------------------------------------------------------------------------------------------------------------------|---------------------------------------------------------------------------------------------------------|-------------------------------|
| 'DE-RuR' | '2011-2014' | Borchard, N., Schirrmann, M., von Hebel, C., Schmidt, M., Baatz, R., Les Firbank, L., Vereecken, H., Herbst, M., 2015: Spatio-temporal drivers of soil and ecosystem carbon fluxes at field scale in an upland grassland in Germany. <i>AGEE</i> , 211, 84-93. | <a href="http://dx.doi.org/10.1016/j.agee.2015.05.008">http://dx.doi.org/10.1016/j.agee.2015.05.008</a> | -                             |
| 'DE-RuS' | '2011-2014' | Eder, F., Schmidt, M., Damian, T., Träumner, K., Mauder, M., 2014: Mesoscale eddies affect near-surface turbulent exchange: evidence from lidar and tower measurements. <i>Journal of Applied Meteorology and Climatology</i> , submitted.                     |                                                                                                         | -                             |
| 'DE-Seh' | '2007-2010' | Schmidt, M., Reichenau, T. G., Fiener, P. and Schneider, K.: The carbon budget of a winter wheat field: An eddy covariance analysis of seasonal and inter-annual variability, <i>Agric. For. Meteorol.</i> , 165, 114–126, 2012.                               | -                                                                                                       | -                             |
| 'DE-SfN' | '2012-2014' | Hommeltenberg, J., Schmid, H. P., Drösler, M. and Werle, P.: Can a bog drained for forestry be a stronger carbon sink than a natural bog forest?, <i>Biogeosciences</i> , 11(13), 3477–3493, 2014.                                                             | -                                                                                                       | -                             |
| 'DE-Tha' | '1996-2014' | Grünwald, T. and Bernhofer, C.: A decade of carbon, water and energy flux measurements of an old spruce forest at the Anchor Station Tharandt, <i>Tellus B Chem. Phys. Meteorol.</i> , 59(3), 387–396, 2007.                                                   | -                                                                                                       | Supported by BMBF (01LK1224B) |

|          |             |                                                                                                                                                                                                                                                                                 |                                                                                                                   |                                                                       |
|----------|-------------|---------------------------------------------------------------------------------------------------------------------------------------------------------------------------------------------------------------------------------------------------------------------------------|-------------------------------------------------------------------------------------------------------------------|-----------------------------------------------------------------------|
| 'DE-Zrk' | '2013-2014' | D. Zak, H. Reuter, J. Augustin, T. Shatwell, M. Barth, J. Gelbrecht, and R. J. McInnes. Changes of the CO <sub>2</sub> and CH <sub>4</sub> production potential of rewetted fens in the perspective of temporal vegetation shifts. <i>Biogeosciences</i> , 12, 2455–2468, 2015. | 10.5194/bg-12-2455-2015                                                                                           | Data provided by T. Sachs, GFZ German Research Centre for Geosciences |
| 'DK-NuF' | '2008-2014' | Westergaard-Nielsen A, Lund M, Hansen BU, Tamstorf M. 2013. Camera derived vegetation greenness index as proxy for gross primary production in a low Arctic wetland area. <i>ISPRS</i> 86: 89-99                                                                                | <a href="http://dx.doi.org/10.1016/j.isprsjprs.2013.09.006">http://dx.doi.org/10.1016/j.isprsjprs.2013.09.006</a> | Data were provided by the Greenland Ecosystem Monitoring Programme    |
| 'DK-Sor' | '1996-2014' | Pilegaard, K., Ibrom, A., Courtney, M. S., Hummelshøj, P. and Jensen, N. O.: Increasing net CO <sub>2</sub> uptake by a Danish beech forest during the period from 1996 to 2009, <i>Agric. For. Meteorol.</i> , 151(7), 934–946, 2011.                                          | -                                                                                                                 | -                                                                     |
| 'DK-ZaF' | '2008-2011' | Soegaard, H and Nordstroem, C (1999) Carbon dioxide exchange in a high-arctic fen estimated by eddy covariance measurements and modelling. <i>Global Change Biology</i> 5, 547-562                                                                                              | -                                                                                                                 | Data were provided by the Greenland Ecosystem Monitoring Programme    |
| 'DK-ZaH' | '2000-2014' | Lund, M., Falk, J. M., Friborg, T., Mbufong, H. N., Sigsgaard, C., Soegaard, H. and Tamstorf, M. P.: Trends in CO <sub>2</sub> exchange in a high Arctic tundra heath, 2000–2010, <i>J. Geophys. Res.</i> , 117(G2), G02001, 2012.                                              | 10.1029/2011JG001901                                                                                              | Data were provided by the Greenland Ecosystem Monitoring Programme    |

|              |             |                                                                                                                                                                                                                                                                                          |   |   |
|--------------|-------------|------------------------------------------------------------------------------------------------------------------------------------------------------------------------------------------------------------------------------------------------------------------------------------------|---|---|
| 'ES-<br>Amo' | '2007-2012' | López-Ballesteros, A., Serrano-Ortiz, P., Kowalski, A.S., Sánchez-Cañete, E.P., Scott, R.L. and Domingo F.: Subterranean ventilation of allochthonous CO governs net CO exchange in a semiarid Mediterranean grassland, <i>Agricultural and Forest Meteorology</i> , 234, 115-126, 2017. | - | - |
| 'ES-<br>LJu' | '2004-2013' | Serrano-Ortiz, P., Domingo, F., Cazorla, A., Were, A., Cuezva, S., Villagarcía, L., Alados-Arboledas, L. and Kowalski, A.S.: Interannual CO <sub>2</sub> exchange of a sparse Mediterranean shrubland on a carbonaceous substrate, <i>J. Geophys. Res.</i> , 114, G04015, 2009.          | - | - |
| 'ES-<br>LgS' | '2007-2009' | Reverter, B. R., Sánchez-Cañete, E. P., Resco, V., Serrano-Ortiz, P., Oyonarte, C. and Kowalski, A. S.: Analyzing the major drivers of NEE in a Mediterranean alpine shrubland, <i>Biogeosciences</i> , 7(9), 2601–2611, 2010.                                                           | - | - |
| 'FI-<br>Hyy' | '1996-2014' | Suni, T., Rinne, J., Reissell, A., Altimir, N., Keronen, P., Rannik, Ü., Maso, M. D., Kulmala, M. and Vesala, T.: Long-term measurements of surface fluxes above a Scots pine forest in Hyytiälä, southern Finland, 1996–2001, <i>BOREAL ENVIRONMENT RESEARCH</i> , 8, 287–301, 2003.    | - | - |



|          |             |                                                                                                                                                                                                                                                                                                           |                           |                                                                         |
|----------|-------------|-----------------------------------------------------------------------------------------------------------------------------------------------------------------------------------------------------------------------------------------------------------------------------------------------------------|---------------------------|-------------------------------------------------------------------------|
| 'FI-Jok' | '2000-2003' | Lohila, A., Aurela, M., Tuovinen, J.-P. and Laurila, T.: Annual CO <sub>2</sub> exchange of a peat field growing spring barley or perennial forage grass, <i>J. Geophys. Res.</i> , 109(D18), D18116, 2004.                                                                                               | -                         | -                                                                       |
| 'FI-Let' | '2009-2012' | Koskinen, M., Minkkinen, K., Ojanen, P., Kämäräinen, M., Laurila, T. and Lohila, A.: Measurements of the CO <sub>2</sub> exchange with an automated chamber system throughout the year: challenges in measuring the nighttime respiration in porous peat soil, <i>Biogeosciences</i> , 11, 347-363, 2014. | -                         | -                                                                       |
| 'FI-Lom' | '2007-2009' | Aurela, M., Lohila, A., J-P., T., Hatakka, J., Penttilä, T. and Laurila, T.: Carbon dioxide and energy flux measurements in four northern-boreal ecosystems at Pallas, <i>Boreal Environment Research</i> , 20, 455–473, 2015.                                                                            | -                         | -                                                                       |
| 'FI-Sod' | '2001-2014' | Thum, T., Aalto, T., Laurila, T., Aurela, M., Kolari, P. and Hari, P.: Parametrization of two photosynthesis models at the canopy scale in a northern boreal Scots pine forest, <i>Tellus B Chem. Phys. Meteorol.</i> , 59(5), 874–890, 2007.                                                             | -                         | -                                                                       |
| 'FR-Fon' | '2005-2014' | Bazot, S., Barthes, L., Blanot, D. & Fresneau, C. Distribution of non-structural nitrogen and carbohydrate compounds in mature oak trees in a                                                                                                                                                             | 10.1007/s00468-013-0853-5 | Acknowledges earlier European carbon projects (CARBOEURO PE, CARBOEXTRE |

|          |             |                                                                                                                                                                                                                                                                                                                                                                                                                      |   |                                          |
|----------|-------------|----------------------------------------------------------------------------------------------------------------------------------------------------------------------------------------------------------------------------------------------------------------------------------------------------------------------------------------------------------------------------------------------------------------------|---|------------------------------------------|
|          |             | temperate forest at four key phenological stages. Trees-Structure and Function 27, 1023-1034.                                                                                                                                                                                                                                                                                                                        |   | ME) plus the current ICOS infrastructure |
| 'FR-Gri' | '2004-2014' | Loubet B., Laville P., Lehuger S., Larmanou E., Flécharde C., Mascher N., Générmon S., Roche R., Ferrara R.M., Stella P., Personne E., Durand B., Decuq C., Flura D., Masson S., Fanucci O., Rampon J.N., Siemens J., Kindler R., Gabrielle B., Schrupf M. and Cellier P.: Carbon, nitrogen and Greenhouse gases budgets over a four years crop rotation in northern France Plant and Soil, 343, 1/2, 109–137, 2011. | - | -                                        |
| 'FR-LBr' | '1996-2008' | Berbigier, P., Bonnefond, J.-M. and Mellmann, P.: CO2 and water vapour fluxes for 2 years above Euroflux forest site, Agric. For. Meteorol., 108(3), 183–197, 2001.                                                                                                                                                                                                                                                  | - | -                                        |
| 'FR-Pue' | '2000-2014' | Rambal, S., Joffre, R., Ourcival, J. M., Cavender-Bares, J. and Rocheteau, A.: The growth respiration component in eddy CO2 flux from a Quercus ilex mediterranean forest, Glob. Chang. Biol., 10(9), 1460–1469, 2004.                                                                                                                                                                                               | - | -                                        |
| 'GF-Guy' | '2004-2014' | Bonal, D., Bosc, A., Ponton, S., Goret, J.-Y., Burban, B., Gross, P., Bonnefond, J.-M., Elbers, J., Longdoz, B., Epron, D., Guehl, J.-M. and Granier, A.: Impact of severe dry season on net ecosystem exchange in the Neotropical                                                                                                                                                                                   | - | -                                        |

|          |             |                                                                                                                                                                                                                                                                                    |   |   |
|----------|-------------|------------------------------------------------------------------------------------------------------------------------------------------------------------------------------------------------------------------------------------------------------------------------------------|---|---|
|          |             | rainforest of French Guiana, <i>Glob. Chang. Biol.</i> , 14(8), 1917–1933, 2008.                                                                                                                                                                                                   |   |   |
| 'GH-Ank' | '2011-2014' | Chiti, T., Certini, G., Grieco, E. and Valentini, R.: The role of soil in storing carbon in tropical rainforests: the case of Ankasa Park, Ghana, <i>Plant Soil</i> , 331, 453-461, 2010.                                                                                          | - | - |
| 'GH-Ank' | '2011-2014' | Chiti, T., Certini, G., Grieco, E. and Valentini, R.: The role of soil in storing carbon in tropical rainforests: the case of Ankasa Park, Ghana, <i>Plant Soil</i> , 331, 453-461, 2010.                                                                                          | - | - |
| 'IT-BCi' | '2004-2014' | Vitale, L., Di Tommasi, P., D'Urso, G. and Magliulo, V.: The response of ecosystem carbon fluxes to LAI and environmental drivers in a maize crop grown in two contrasting seasons, <i>Int. J. Biometeorol.</i> , 60(3), 411–420, 2016.                                            | - | - |
| 'IT-CA1' | '2011-2014' | Sabbatini, S., Arriga, N., Bertolini, T., Castaldi, S., Chiti, T., Consalvo, C., Njakou Djomo, S., Gioli, B., Matteucci, G. and Papale, D.: Greenhouse gas balance of cropland conversion to bioenergy poplar short-rotation coppice, <i>Biogeosciences</i> , 13(1), 95–113, 2016. | - | - |
| 'IT-CA2' | '2011-2014' | Sabbatini, S., Arriga, N., Bertolini, T., Castaldi, S., Chiti, T., Consalvo, C., Njakou Djomo, S., Gioli, B., Matteucci, G. and Papale, D.: Greenhouse gas                                                                                                                         | - | - |

|          |             |                                                                                                                                                                                                                                                                                      |                                                                                                    |   |
|----------|-------------|--------------------------------------------------------------------------------------------------------------------------------------------------------------------------------------------------------------------------------------------------------------------------------------|----------------------------------------------------------------------------------------------------|---|
|          |             | balance of cropland conversion to bioenergy poplar short-rotation coppice, <i>Biogeosciences</i> , 13(1), 95–113, 2016.                                                                                                                                                              |                                                                                                    |   |
| 'IT-CA3' | '2011-2014' | Sabbatini, S., Arriga, N., Bertolini, T., Castaldi, S., Chiti, T., Consalvo, C., Njakou Djomo, S., Gioli, B., Matteucci, G. and Papale, D.: Greenhouse gas balance of cropland conversion to bioenergy poplar short-rotation coppice, <i>Biogeosciences</i> , 13(1), 95–113, 2016.   | -                                                                                                  | - |
| 'IT-Col' | '1996-2014' | Valentini, R., De Angelis, P., Matteucci, G., Monaco, R., Dore, S. and Mugnozza, G. E. S.: Seasonal net carbon dioxide exchange of a beech forest with the atmosphere, <i>Glob. Chang. Biol.</i> , 2(3), 199–207, 1996.                                                              | -                                                                                                  | - |
| 'IT-Cp2' | '2012-2014' | Fares, S., Savi, F., Muller, J., Matteucci, G. and Paoletti, E.: Simultaneous measurements of above and below canopy ozone fluxes help partitioning ozone deposition between its various sinks in a Mediterranean Oak Forest, <i>Agric. For. Meteorol.</i> , 198–199, 181–191, 2014. | -                                                                                                  | - |
| 'IT-Cpz' | '1997-2009' | Garbulsky, M.F., Penuelas, J., Papale, D., Filella, I.: Remote estimation of carbon dioxide uptake by a Mediterranean forest. <i>Global Change Biology</i> , 14, 2860–2867, 2008.                                                                                                    | -                                                                                                  | - |
| 'IT-Isp' | '2013-2014' | Estimating heterotrophic and autotrophic soil respiration in a semi-natural forest of Lombardy, Italy                                                                                                                                                                                | <a href="https://doi.org/10.1016/j.pedobi.2012.05.001">dx.doi.org/10.1016/j.pedobi.2012.05.001</a> | - |

|          |             |                                                                                                                                                                                                                                                                                                                                    |                                  |   |
|----------|-------------|------------------------------------------------------------------------------------------------------------------------------------------------------------------------------------------------------------------------------------------------------------------------------------------------------------------------------------|----------------------------------|---|
| 'IT-La2' | '2000-2002' | Marcolla. B., Pitacco, A., Cescatti, A.: Canopy architecture and turbulence structure in a Coniferous forest. <i>Boundary-Layer Meteorology</i> , 108, 39–59, 2003.                                                                                                                                                                | -                                | - |
| 'IT-Lav' | '2003-2014' | Marcolla. B., Pitacco, A., Cescatti, A.: Canopy architecture and turbulence structure in a Coniferous forest. <i>Boundary-Layer Meteorology</i> , 108, 39–59, 2003.                                                                                                                                                                | -                                | - |
| 'IT-MBo' | '2003-2013' | Marcolla, B., Cescatti, A., Manca, G., Zorer, R., Cavagna, M., Fiora, A., Gianelle, D., Rodeghiero, M., Sottocornola, M. and Zampedri, R.: Climatic controls and ecosystem responses drive the inter-annual variability of the net ecosystem exchange of an alpine meadow, <i>Agric. For. Meteorol.</i> , 151(9), 1233–1243, 2011. | -                                | - |
| 'IT-Noe' | '2004-2014' | MARRAS S., PYLES R.D, SIRCA C., PAW U K.T., SNYDER R.L., DUCE P., SPANO D. 2011. Evaluation of the Advanced Canopy-Atmosphere-Soil Algorithm (ACASA) model performance over Mediterranean maquis ecosystem. <i>Agricultural and Forest Meteorology</i> 151: 730-745.                                                               | 10.1016/j.agrform et.2011.02.004 | - |
| 'IT-PT1' | '2002-2004' | Migliavacca, M., Meroni, M., Busetto, L., Colombo, R., Zenone, T., Matteucci, G., Manca, G. and Seufert, G.: Modeling Gross Primary Production of Agro-Forestry Ecosystems                                                                                                                                                         | -                                | - |

|          |             |                                                                                                                                                                                                                                                                                                                                                               |   |   |
|----------|-------------|---------------------------------------------------------------------------------------------------------------------------------------------------------------------------------------------------------------------------------------------------------------------------------------------------------------------------------------------------------------|---|---|
|          |             | by Assimilation of Satellite-Derived Information in a Process-Based Model, <i>Sensors</i> , 9(2), 922–942, 2009.                                                                                                                                                                                                                                              |   |   |
| 'IT-Ren' | '1998-2013' | Montagnani, L., Manca, G., Canepa, E., Georgieva, E., Acosta, M., Feigenwinter, C., Janous, D., Kerschbaumer, G., Lindroth, A., Minach, L., Minerbi, S., Mölder, M., Pavelka, M., Seufert, G., Zeri, M. and Ziegler, W.: A new mass conservation approach to the study of CO2 advection in an alpine forest, <i>J. Geophys. Res.</i> , 114(D7), D07306, 2009. | - | - |
| 'IT-Ro1' | '2000-2008' | Rey, A., Pegoraro, E., Tedeschi, V., De Parri, I., Jarvis, P. G. and Valentini, R.: Annual variation in soil respiration and its components in a coppice oak forest in Central Italy, <i>Glob. Chang. Biol.</i> , 8(9), 851–866, 2002.                                                                                                                        | - | - |
| 'IT-Ro2' | '2002-2012' | Tedeschi, V., Rey, A., Manca, G., Valentini, R., Jarvis, P. G. and Borghetti, M.: Soil respiration in a Mediterranean oak forest at different developmental stages after coppicing, <i>Glob. Chang. Biol.</i> , 12(1), 110–121, 2006.                                                                                                                         | - | - |
| 'IT-SRo' | '1999-2012' | Chiesi, M., Maselli, F., Bindi, M., Fibbi, L., Cherubini, P., Arlotta, E., Tirone, G., Matteucci, G. and Seufert, G.: Modelling carbon budget of Mediterranean forests using ground and remote sensing measurements, <i>Agric. For.</i>                                                                                                                       | - | - |

|          |             |                                                                                                                                                                                                                                                                                                                                         |                                  |                                                 |
|----------|-------------|-----------------------------------------------------------------------------------------------------------------------------------------------------------------------------------------------------------------------------------------------------------------------------------------------------------------------------------------|----------------------------------|-------------------------------------------------|
|          |             | Meteorol., 135(1–4), 22–34, 2005.                                                                                                                                                                                                                                                                                                       |                                  |                                                 |
| 'IT-Tor' | '2008-2014' | Galvagno, M., Wohlfahrt, G., Cremonese, E., Rossini, M., Colombo, R., Filippa, G., Julitta, T., Manca, G., Siniscalco, C., di Cella, U. M. and Migliavacca, M.: Phenology and carbon dioxide source/sink strength of a subalpine grassland in response to an exceptionally short snow season, Environ. Res. Lett., 8(2), 025008, 2013.  | doi:10.1088/1748-9326/8/2/025008 | Interreg Alcotra 2007-2013 PHENOALP and e-PHENO |
| 'JP-MBF' | '2003-2005' | Matsumoto, K., Ohta, T., Nakai, T., Kuwada, T., Daikoku, K., Iida, S., Yabuki, H., Kononov, A. V., van der Molen, M. K., Kodama, Y., Maximov, T. C., Dolman, A. J. and Hattori, S.: Energy consumption and evapotranspiration at several boreal and temperate forests in the Far East, Agric. For. Meteorol., 148(12), 1978–1989, 2008. | -                                | -                                               |
| 'JP-SMF' | '2002-2006' | Matsumoto, K., Ohta, T., Nakai, T., Kuwada, T., Daikoku, K., Iida, S., Yabuki, H., Kononov, A. V., van der Molen, M. K., Kodama, Y., Maximov, T. C., Dolman, A. J. and Hattori, S.: Energy consumption and evapotranspiration at several boreal and temperate forests in the Far East, Agric. For. Meteorol., 148(12), 1978–1989, 2008. | -                                | -                                               |

|          |             |                                                                                                                                                                                                                                                                                     |   |   |
|----------|-------------|-------------------------------------------------------------------------------------------------------------------------------------------------------------------------------------------------------------------------------------------------------------------------------------|---|---|
| 'NL-Hor' | '2004-2011' | Jacobs, C. M. J., Jacobs, A. F. G., Bosveld, F. C., Hendriks, D. M. D., Hensen, A., Kroon, P. S., Moors, E. J., Nol, L., Schrier-Uijl, A. and Veenendaal, E. M.: Variability of annual CO <sub>2</sub> exchange from Dutch grasslands, <i>Biogeosciences</i> , 4(5), 803–816, 2007. | - | - |
| 'NL-Loo' | '1996-2014' | Moors, E. J.: Water Use of Forests in The Netherlands, PhD-thesis, Vrije Universiteit Amsterdam., the Netherlands, 2012.                                                                                                                                                            | - | - |
| 'NO-Blv' | '2008-2009' | Lüers, J., Westermann, S., Piel, K. and Boike, J.: Annual CO <sub>2</sub> budget and seasonal CO <sub>2</sub> exchange signals at a high Arctic permafrost site on Spitsbergen, Svalbard archipelago, <i>Biogeosciences</i> , 11(22), 6307–6322, 2014.                              | - | - |
| 'PA-SPn' | '2007-2009' | Wolf, S., Eugster, W., Potvin, C., Turner, B. L. and Buchmann, N.: Carbon sequestration potential of tropical pasture compared with afforestation in Panama. <i>Global Change Biology</i> , 17: 2763–2780, 2011.                                                                    | - | - |
| 'PA-SPs' | '2007-2009' | Wolf, S., Eugster, W., Potvin, C., Turner, B. L. and Buchmann, N.: Carbon sequestration potential of tropical pasture compared with afforestation in Panama. <i>Global Change Biology</i> , 17: 2763–2780, 2011.                                                                    | - | - |



|          |             |                                                                                                                                                                                                                                                                                                                                              |                         |   |
|----------|-------------|----------------------------------------------------------------------------------------------------------------------------------------------------------------------------------------------------------------------------------------------------------------------------------------------------------------------------------------------|-------------------------|---|
| 'RU-Che' | '2002-2005' | Merbold, L., Kutsch, W. L., Corradi, C., Kolle, O., Rebmann, C., Stoy, P. C., Zimov, S. A. and Schulze, E.-D.: Artificial drainage and associated carbon fluxes (CO <sub>2</sub> /CH <sub>4</sub> ) in a tundra ecosystem, <i>Glob. Chang. Biol.</i> , 15(11), 2599–2614, 2009a.                                                             | -                       | - |
| 'RU-Cok' | '2003-2014' | van der Molen, M. K. van der, Huissteden, J. van, Parmentier, F. J. W., Petrescu, A. M. R., Dolman, A. J., Maximov, T. C., Kononov, A. V., Karsanaev, S. V. and Suzdalov, D. A.: The growing season greenhouse gas balance of a continental tundra site in the Indigirka lowlands, NE Siberia, <i>Biogeosciences</i> , 4(6), 985–1003, 2007. | -                       | - |
| 'RU-Fyo' | '1998-2014' | Kurbatova, J., Li, C., Varlagin, A., Xiao, X. and Vygodskaya, N.: Modeling carbon dynamics in two adjacent spruce forests with different soil conditions in Russia, <i>Biogeosciences</i> , 5(4), 969–980, 2008.                                                                                                                             | -                       | - |
| 'RU-Ha1' | '2002-2004' | Marchesini, L. B., Papale, D., Reichstein, M., Vuichard, N., Tchebakova, N. and Valentini, R.: Carbon balance assessment of a natural steppe of southern Siberia by multiple constraint approach, <i>Biogeosci. Discuss.</i> , 4(1), 165–208, 2007.                                                                                          | -                       | - |
| 'RU-Sam' | '2002-2014' | Boike et al.: Baseline characteristics of climate, permafrost and land cover                                                                                                                                                                                                                                                                 | 10.5194/bg-10-2105-2013 | - |

|          |             |                                                                                                                                                                                                                                                                                                                                                                                                                                      |                                   |                                                                                                                         |
|----------|-------------|--------------------------------------------------------------------------------------------------------------------------------------------------------------------------------------------------------------------------------------------------------------------------------------------------------------------------------------------------------------------------------------------------------------------------------------|-----------------------------------|-------------------------------------------------------------------------------------------------------------------------|
|          |             | from a new permafrost observatory in the Lena River Delta, Siberia (1998–2011). <i>Biogeosciences</i> , 10, 2105–2128, 2013.                                                                                                                                                                                                                                                                                                         |                                   |                                                                                                                         |
| 'SD-Dem' | '2005-2009' | Ardö, J., Mölder, M., El-Tahir, B. A. and Elkhidir, H. A. M.: Seasonal variation of carbon fluxes in a sparse savanna in semi arid Sudan, <i>Carbon Balance Manag.</i> , 3, 7, 2008.                                                                                                                                                                                                                                                 | -                                 | -                                                                                                                       |
| 'SE-St1' | '2012-2014' | Jammet, M., Crill, P., Dengel, S., and Friborg, T.: Large methane emissions from a subarctic lake during spring thaw: Mechanisms and landscape significance, <i>J. Geophys. Res. Biogeosci.</i> , 120, 2289–2305, 2015.                                                                                                                                                                                                              | 10.1111/j.1365-2486.2006.01267.x. | Supported by the Center of Excellence DEFROST, the EU-funded project PAGE21, and the project INTERACT                   |
| 'SN-Dhr' | '2010-2013' | Tagesson, T., Fensholt, R., Guiro, I., Rasmussen, M. O., Huber, S., Mbow, C., Garcia, M., Horion, S., Sandholt, I., Holm-Rasmussen, B., Göttsche, F. M., Ridler, M.-E., Olén, N., Lundegard Olsen, J., Ehammer, A., Madsen, M., Olesen, F. S. and Ardö, J.: Ecosystem properties of semiarid savanna grassland in West Africa and its relationship with environmental variability, <i>Glob. Chang. Biol.</i> , 21(1), 250–264, 2015. | -                                 | -                                                                                                                       |
| 'US-ARM' | '2003-2012' | Dennis Baldocchi, Cove Sturtevant (2015) Does day and night sampling reduce spurious correlation between canopy photosynthesis and ecosystem respiration?, <i>Agricultural and Forest</i>                                                                                                                                                                                                                                            | 10.1016/j.agrformet.2015.03.010   | This research was supported by the Office of Biological and Environmental Research of the US Department of Energy under |

|          |             |                                                                                                                                                                                                                                                                                          |                                 |                                                                                               |
|----------|-------------|------------------------------------------------------------------------------------------------------------------------------------------------------------------------------------------------------------------------------------------------------------------------------------------|---------------------------------|-----------------------------------------------------------------------------------------------|
|          |             | Meteorology, 207(), 117-126                                                                                                                                                                                                                                                              |                                 | contract No. DE-AC02-05CH11231 as part of the Atmospheric Radiation Measurement Program (ARM) |
| 'US-Atq' | '2003-2008' | Kwon, H.J., Oechel, W.C., Zulueta, R.C., Hastings, S.J. (2005) Effects Of Climate Variability On Carbon Sequestration Among Adjacent Wet Sedge Tundra And Moist Tussock Tundra Ecosystems, Journal Of Geophysical Research: Biogeosciences, 111(G3), 2005-2012                           | 10.1029/2005JG000036            | -                                                                                             |
| 'US-Blo' | '1997-2007' | Baker, B., Guenther, A., Greenberg, J., Goldstein, A., Fall, R. (1999) Canopy Fluxes Of 2-Methyl-3-Buten-2-Ol Over A Ponderosa Pine Forest By Relaxed Eddy Accumulation: Field Data And Model Comparison, Journal Of Geophysical Research: Atmospheres, 104(D21), 26107-26114            | 10.1029/1999jd900749            | -                                                                                             |
| 'US-CRT' | '2011-2013' | Chu, H., Chen, J., Gottgens, J. F., Desai, A. R., Ouyang, Z., Qian, S. S. (2016) Response And Biophysical Regulation Of Carbon Dioxide Fluxes To Climate Variability And Anomaly In Contrasting Ecosystems In Northwestern Ohio, Usa, Agricultural And Forest Meteorology, 220(5), 50-68 | 10.1016/j.agrformet.2016.01.008 | Supported by NOAA (NA10OAR4170224) & NSF (NSF1034791)                                         |
| 'US-GBT' | '1999-2006' | Zeller, K. (2000) Wintertime Ozone Fluxes And Profiles Above A                                                                                                                                                                                                                           | 10.1175/1520-0450(2000)039<0    | -                                                                                             |

|          |             |                                                                                                                                                                                                                                                                                                                                                                                   |                                  |                                                                                                                                                                                                                                                                   |
|----------|-------------|-----------------------------------------------------------------------------------------------------------------------------------------------------------------------------------------------------------------------------------------------------------------------------------------------------------------------------------------------------------------------------------|----------------------------------|-------------------------------------------------------------------------------------------------------------------------------------------------------------------------------------------------------------------------------------------------------------------|
|          |             | Subalpine Spruce-Fir Forest, Journal Of Applied Meteorology, 39(1), 92-101                                                                                                                                                                                                                                                                                                        | 092:WOFAPA>2.0.CO;2              |                                                                                                                                                                                                                                                                   |
| 'US-GLE' | '2004-2014' | Arain, M. A., Restrepo-Coupe, N. (2005) Net Ecosystem Production In A Temperate Pine Plantation In Southeastern Canada, Agricultural And Forest Meteorology, 128(3-4), 223-241                                                                                                                                                                                                    | 10.1016/j.agrform et.2004.10.003 | -                                                                                                                                                                                                                                                                 |
| 'US-Goo' | '2002-2006' | Benjamin R. K. Runkle, James R. Rigbyb, Michele L. Rebac, Saseendran S. Anapallid, Joydeep Bhattacharjee, Ken W. Kraussf, Lu Liangg, Martin A. Locke, Kimberly A. Novick, Ruixiu Suid, Kosana Suvočareva and Paul M. White (2017) Delta-Flux: An Eddy Covariance Network for a Climate-Smart Lower Mississippi Basin, Agricultural & Environmental Letters, 2(1), 170003 - 170003 | 10.2134/ael2017.01.0003          | -                                                                                                                                                                                                                                                                 |
| 'US-Ha1' | '1991-2012' | Barford, C. C., Wofsy, S. C., Goulden, M. L., Munger, J. W., Pyle, E. H., Urbanski, S. P., Hutyra, L., Saleska, S. R., Fitzjarrald, D., Moore, K. (2001) Factors Controlling Long-And Short-Term Sequestration Of Atmospheric CO2 In A Mid-Latitude Forest, Science, 294(5547), 1688-1691                                                                                         | 10.1126/science.1062962          | Operation of the US-Ha1 site is supported by the AmeriFlux Management Project with funding by the U.S. Department of Energy's Office of Science under Contract No. DE-AC02-05CH11231, and additionally is a part of the Harvard Forest LTER site supported by the |

|          |             |                                                                                                                                                                                                                                                                              |                           |                                            |
|----------|-------------|------------------------------------------------------------------------------------------------------------------------------------------------------------------------------------------------------------------------------------------------------------------------------|---------------------------|--------------------------------------------|
|          |             |                                                                                                                                                                                                                                                                              |                           | National Science Foundation (DEB-1237491). |
| 'US-IB2' | '2004-2011' | Allison, V. J., Miller, R. M., Jastrow, J. D., Matamala, R., Zak, D. R. (2005) Changes In Soil Microbial Community Structure In A Tallgrass Prairie Chronosequence, Soil Science Society Of America Journal, 69(5), 1412-1421                                                | 10.2136/sssaj2004.0252    | -                                          |
| 'US-Ivo' | '2004-2007' | McEwing, K. R., Fisher, J. P., Zona, D. (2015) Environmental And Vegetation Controls On The Spatial Variability Of CH4 Emission From Wet-Sedge And Tussock Tundra Ecosystems In The Arctic, Plant And Soil, 388(1-2), 37-52                                                  | 10.1007/s11104-014-2377-1 | -                                          |
| 'US-KS1' | '2002-2002' | Bracho, R., Powell, T. L., Dore, S., Li, J., Hinkle, C. R., Drake, B. G. (2008) Environmental And Biological Controls On Water And Energy Exchange In Florida Scrub Oak And Pine Flatwoods Ecosystems, Journal Of Geophysical Research: Biogeosciences, 113(G02004), n/a-n/a | 10.1029/2007jg000469      | -                                          |
| 'US-KS2' | '2003-2006' | Bracho, R., Powell, T. L., Dore, S., Li, J., Hinkle, C. R., Drake, B. G. (2008) Environmental And Biological Controls On Water And Energy                                                                                                                                    | 10.1029/2007jg000469      | -                                          |

|          |             |                                                                                                                                                                                                                                                                                                                                                                                                                |                                  |                                                                                                                                |
|----------|-------------|----------------------------------------------------------------------------------------------------------------------------------------------------------------------------------------------------------------------------------------------------------------------------------------------------------------------------------------------------------------------------------------------------------------|----------------------------------|--------------------------------------------------------------------------------------------------------------------------------|
|          |             | Exchange In Florida Scrub Oak And Pine Flatwoods Ecosystems, Journal Of Geophysical Research: Biogeosciences, 113(G02004), n/a-n/a                                                                                                                                                                                                                                                                             |                                  |                                                                                                                                |
| 'US-LWW' | '1997-1998' | Meyers, T. P. (2001) A Comparison Of Summertime Water And CO2 Fluxes Over Rangeland For Well Watered And Drought Conditions, Agricultural And Forest Meteorology, 106(3), 205-214                                                                                                                                                                                                                              | 10.1016/s0168-1923(00)00213-6    | -                                                                                                                              |
| 'US-Los' | '2000-2014' | Baker, I., Denning, A. S., Hanan, N., Prihodko, L., Uliasz, M., Vidale, P., Davis, K., Bakwin, P. (2003) Simulated And Observed Fluxes Of Sensible And Latent Heat And CO2 At The WLEF-TV Tower Using SiB2.5, Global Change Biology, 9(9), 1262-1277                                                                                                                                                           | 10.1046/j.1365-2486.2003.00671.x | -                                                                                                                              |
| 'US-MMS' | '1999-2014' | Baldocchi, D. D., Black, T. A., Curtis, P. S., Falge, E., Fuentes, J. D., Granier, A., Gu, L., Knohl, A., Lee, X., Pilegaard, K., Schmid, H. P., Valentini, R., Wilson, K., Wofsy, S., Xu, L., Yamamoto, S. (2005) Predicting The Onset Of Net Carbon Uptake By Deciduous Forests With Soil Temperature And Climate Data: A Synthesis Of FLUXNET Data, International Journal Of Biometeorology, 49(6), 377-387 | 10.1007/s00484-005-0256-4        | Research at the MMSF site was supported by the Office of Science (BER), U.S. Department of Energy, Grant No. DE-FG02-07ER64371 |

|          |             |                                                                                                                                                                                            |                                  |                                                                                                                                                                       |
|----------|-------------|--------------------------------------------------------------------------------------------------------------------------------------------------------------------------------------------|----------------------------------|-----------------------------------------------------------------------------------------------------------------------------------------------------------------------|
| 'US-Me1' | '2004-2005' | Bond-Lamberty, B., Wang, C., Gower, S. T. (2004) A Global Relationship Between The Heterotrophic And Autotrophic Components Of Soil Respiration?, Global Change Biology, 10(10), 1756-1766 | 10.1111/j.1365-2486.2004.00816.x | DOE acknowledgment for Eyerly site research: This research was supported by the Office of Science (BER), U.S. Department of Energy (DOE, Grant no. DE-FG02-06ER64318) |
| 'US-Me2' | '2002-2014' | Campbell, J. L., Sun, O. J., Law, B. E. (2004) Disturbance And Net Ecosystem Production Across Three Climatically Distinct Forest Landscapes, Global Biogeochemical Cycles, 18(4), n/a-n/a | 10.1029/2004gb002236             | The Metolius AmeriFlux research was supported by the Office of Science (BER), U.S. Department of Energy, Grant No. DE-FG02-06ER64318).                                |
| 'US-Me3' | '2004-2009' | Bond-Lamberty, B., Wang, C., Gower, S. T. (2004) A Global Relationship Between The Heterotrophic And Autotrophic Components Of Soil Respiration?, Global Change Biology, 10(10), 1756-1766 | 10.1111/j.1365-2486.2004.00816.x | The Metolius AmeriFlux research was supported by the Office of Science (BER), U.S. Department of Energy, Grant No. DE-FG02-06ER64318).                                |
| 'US-Me4' | '1996-2000' | Anthoni, P. M., Law, B. E., Unsworth, M. H. (1999) Carbon And Water Vapor Exchange Of An Open-Canopied Ponderosa Pine Ecosystem, Agricultural And Forest Meteorology, 95(3), 151-168       | 10.1016/s0168-1923(99)00029-5    | This study was supported by NASA (grant # NAG5-7531), and the Office of Science (BER), U.S. Department of Energy (grant # FG0300ER63014).                             |

|          |             |                                                                                                                                                                                                                                                                                 |                                  |                                                                                                                                                                             |
|----------|-------------|---------------------------------------------------------------------------------------------------------------------------------------------------------------------------------------------------------------------------------------------------------------------------------|----------------------------------|-----------------------------------------------------------------------------------------------------------------------------------------------------------------------------|
| 'US-Me5' | '2000-2002' | <p>Anthoni, P. M., Unsworth, M. H., Law, B. E., Irvine, J., Baldocchi, D. D., Tuyl, S. V., Moore, D. (2002) Seasonal Differences In Carbon And Water Vapor Exchange In Young And Old-Growth Ponderosa Pine Ecosystems, Agricultural And Forest Meteorology, 111(3), 203-222</p> | 10.1016/s0168-1923(02)00021-7    | <p>This study was funded by NASA (grant # NAG5-7531), and DOE (grant # FG0300ER63014).</p>                                                                                  |
| 'US-Me6' | '2010-2014' | <p>Ruehr, N. K., Martin, J. G., Law, B. E. (2012) Effects Of Water Availability On Carbon And Water Exchange In A Young Ponderosa Pine Forest: Above- And Belowground Responses, Agricultural And Forest Meteorology, 164(21), 136-148</p>                                      | 10.1016/j.agrform et.2012.05.015 | <p>This research was supported by the Office of Science (BER), US Department of Energy (Award DE SC0005322), and a Leopoldina Research Fellowship to NKR (LPDS 2009-37)</p> |
| 'US-Myb' | '2010-2014' | <p>Chamberlain, S. D., Verfaillie, J., Eichelmann, E., Hemes, K. S., Baldocchi, D. D. (2017) Evaluation Of Density Corrections To Methane Fluxes Measured By Open-Path Eddy Covariance Over Contrasting Landscapes, Boundary-Layer Meteorology, 121(1), nnn-<br/>nnn</p>        | 10.1007/s10546-017-0275-9        | <p>Biometeorology Lab, University of California, Berkeley, PI: Dennis Baldocchi</p>                                                                                         |
| 'US-NR1' | '1998-2014' | <p>Arain, M. A., Restrepo-Coupe, N. (2005) Net Ecosystem Production In A Temperate Pine Plantation In Southeastern Canada, Agricultural And Forest Meteorology, 128(3-4), 223-241</p>                                                                                           | 10.1016/j.agrform et.2004.10.003 | -                                                                                                                                                                           |



|          |             |                                                                                                                                                                                                                                               |                                 |                                                                                                           |
|----------|-------------|-----------------------------------------------------------------------------------------------------------------------------------------------------------------------------------------------------------------------------------------------|---------------------------------|-----------------------------------------------------------------------------------------------------------|
| 'US-Ne1' | '2001-2013' | Amos, B., Arkebauer, T. J., Doran, J. W. (2005) Soil Surface Fluxes Of Greenhouse Gases In An Irrigated Maize-Based Agroecosystem, Soil Science Society Of America Journal, 69(2), 387-395                                                    | 10.2136/sssaj2005.0387          | -                                                                                                         |
| 'US-Ne2' | '2001-2013' | Amos, B., Arkebauer, T. J., Doran, J. W. (2005) Soil Surface Fluxes Of Greenhouse Gases In An Irrigated Maize-Based Agroecosystem, Soil Science Society Of America Journal, 69(2), 387-395                                                    | 10.2136/sssaj2005.0387          | -                                                                                                         |
| 'US-Ne3' | '2001-2013' | Amos, B., Arkebauer, T. J., Doran, J. W. (2005) Soil Surface Fluxes Of Greenhouse Gases In An Irrigated Maize-Based Agroecosystem, Soil Science Society Of America Journal, 69(2), 387-395                                                    | 10.2136/sssaj2005.0387          | -                                                                                                         |
| 'US-ORv' | '2011-2011' | Mitsch, W. J., Zhang, L., Stefanik, K. C., Nahlik, A. M., Anderson, C. J., Bernal, B., Hernandez, M., Song, K. (2012) Creating Wetlands: Primary Succession, Water Quality Changes, And Self-Design Over 15 Years, Bioscience, 62(3), 237-250 | 10.1525/bio.2012.62.3.5         | -                                                                                                         |
| 'US-Oho' | '2004-2013' | Chu, H., Chen, J., Gottgens, J. F., Desai, A. R., Ouyang, Z., Qian, S. S. (2016) Response And Biophysical Regulation Of Carbon Dioxide Fluxes To Climate Variability And Anomaly In Contrasting Ecosystems In Northwestern Ohio, Usa,         | 10.1016/j.agrformet.2016.01.008 | USDA FS Southern Global Change Program (cooperative agreements 03-CA-11330147-073 and 04-CA-11330147-238) |

|          |             |                                                                                                                                                                                                                                                                                                                                     |                                  |                                         |
|----------|-------------|-------------------------------------------------------------------------------------------------------------------------------------------------------------------------------------------------------------------------------------------------------------------------------------------------------------------------------------|----------------------------------|-----------------------------------------|
|          |             | Agricultural And Forest Meteorology, 220(3), 50-68                                                                                                                                                                                                                                                                                  |                                  |                                         |
| 'US-PFa' | '1995-2014' | (2012) The Imprint Of Surface Fluxes And Transport On Variations In Total Column Carbon Dioxide, Biogeosciences, 9(3), 875-891                                                                                                                                                                                                      | 10.5194/bg-9-875-2012            | -                                       |
| 'US-Prr' | '2010-2014' | (2015) Understory CO <sub>2</sub> , Sensible Heat, and Latent Heat Fluxes in a Black Spruce Forest in Interior Alaska, Agricultural And Forest Meteorology, 214-215(2), 80-90                                                                                                                                                       | 10.1016/j.agrform.et.2015.08.247 | JICS (JAMSTEC-IARC Collaboration Study) |
| 'US-SRC' | '2008-2014' | Wolf, S., Keenan, T.F., Fisher, J.B., Baldocchi, D.D., Desai, A.R., Richardson, A.D., Scott, R.L., Law, B.E., Litvak, M.E., Brunsell, N.A., Peters, W., van der Laan-Luijkx, I.T. (2016) Warm spring reduced carbon cycle impact of the 2012 US summer drought, Proceedings of the National Academy of Sciences, 113(21), 5880-5885 | 10.1073/pnas.1519620113          | -                                       |
| 'US-SRG' | '2008-2014' | Biederman, J. A., Scott, R. L., Goulden, M. L., Vargas, R., Litvak, M. E., Kolb, T. E., Yepez, E. A., Oechel, W. C., Blanken, P. D., Bell, T. W., Garatuza-Payan, J., Maurer, G. E., Dore, S., Burns, S. P. (2016) Terrestrial Carbon Balance In A Drier World: The Effects Of Water Availability In Southwestern North             | 10.1111/gcb.13222                | -                                       |

|          |             |                                                                                                                                                                                                                                                                                      |                                 |                                                                                                                                     |
|----------|-------------|--------------------------------------------------------------------------------------------------------------------------------------------------------------------------------------------------------------------------------------------------------------------------------------|---------------------------------|-------------------------------------------------------------------------------------------------------------------------------------|
|          |             | America, <i>Global Change Biology</i> , 22(5), 1867-1879                                                                                                                                                                                                                             |                                 |                                                                                                                                     |
| 'US-SRM' | '2004-2014' | Barron-Gafford, G. A., Scott, R. L., Jenerette, G. D., Hamerlynck, E. P., Huxman, T. E. (2013) Landscape And Environmental Controls Over Leaf And Ecosystem Carbon Dioxide Fluxes Under Woody Plant Expansion, <i>Journal Of Ecology</i> , 101(6), 1471-1483                         | 10.1111/1365-2745.12161         | -                                                                                                                                   |
| 'US-Syv' | '2001-2014' | Desai, A. R., Bolstad, P. V., Cook, B. D., Davis, K. J., Carey, E. V. (2005) Comparing Net Ecosystem Exchange Of Carbon Dioxide Between An Old-Growth And Mature Forest In The Upper Midwest, Usa, <i>Agricultural And Forest Meteorology</i> , 128(1-2), 33-55                      | 10.1016/j.agrformet.2004.09.005 | -                                                                                                                                   |
| 'US-Ton' | '2001-2014' | Baldocchi, D. D., Ma, S., Rambal, S., Misson, L., Ourcival, J., Limousin, J., Pereira, J., Papale, D. (2010) On The Differential Advantages Of Evergreenness And Deciduousness In Mediterranean Oak Woodlands: A Flux Perspective, <i>Ecological Applications</i> , 20(6), 1583-1597 | 10.1890/08-2047.1               | This research was supported by the US Department of Energy Terrestrial Carbon Program, grant No. DE-FG03-00ER63013 and DE-SC0005130 |

|          |             |                                                                                                                                                                                                                                                                                                      |                           |                                                                                                                            |
|----------|-------------|------------------------------------------------------------------------------------------------------------------------------------------------------------------------------------------------------------------------------------------------------------------------------------------------------|---------------------------|----------------------------------------------------------------------------------------------------------------------------|
| 'US-Ton' | '2001-2014' | Baldocchi, D. D., Ma, S., Rambal, S., Misson, L., Ourcival, J., Limousin, J., Pereira, J., Papale, D. (2010) On The Differential Advantages Of Evergreenness And Deciduousness In Mediterranean Oak Woodlands: A Flux Perspective, Ecological Applications, 20(6), 1583-1597                         | 10.1890/08-2047.1         | This research was supported in part by the Office of Science (BER), U.S. Department of Energy, Grant No. DE-FG02-03ER63638 |
| 'US-Tw1' | '2012-2014' | Chamberlain, S. D., Verfaillie, J., Eichelmann, E., Hemes, K. S., Baldocchi, D. D. (2017) Evaluation Of Density Corrections To Methane Fluxes Measured By Open-Path Eddy Covariance Over Contrasting Landscapes, Boundary-Layer Meteorology, 237–238(1), 233-245                                     | 10.1007/s10546-017-0275-9 | Biometeorology Lab, University of California, Berkeley, PI: Dennis Baldocchi                                               |
| 'US-Tw2' | '2012-2013' | Knox, S. H., Sturtevant, C., Matthes, J.H., Koteen, L., Verfaillie, J., Baldocchi, D. (2014) Agricultural peatland restoration: effects of land-use change on greenhouse gas (CO <sub>2</sub> and CH <sub>4</sub> ) fluxes in the Sacramento-San Joaquin Delta, Global Change Biology, 21(), 750-765 | 10.1111/gcb.12745         | Biometeorology Lab, University of California, Berkeley, PI: Dennis Baldocchi                                               |
| 'US-Tw3' | '2013-2014' | Chamberlain, S. D., Verfaillie, J., Eichelmann, E., Hemes, K. S., Baldocchi, D. D. (2017) Evaluation Of Density Corrections To Methane Fluxes Measured By Open-Path Eddy Covariance Over Contrasting Landscapes, Boundary-Layer                                                                      | 10.1007/s10546-017-0275-9 | Biometeorology Lab, University of California, Berkeley, PI: Dennis Baldocchi                                               |

|          |             |                                                                                                                                                                                                                                                                                         |                                                                                                                   |                                                                                                                                       |
|----------|-------------|-----------------------------------------------------------------------------------------------------------------------------------------------------------------------------------------------------------------------------------------------------------------------------------------|-------------------------------------------------------------------------------------------------------------------|---------------------------------------------------------------------------------------------------------------------------------------|
|          |             | Meteorology, 207(), 117-126                                                                                                                                                                                                                                                             |                                                                                                                   |                                                                                                                                       |
| 'US-Tw3' | '2013-2014' | Chamberlain, S. D., Verfaillie, J., Eichelmann, E., Hemes, K. S., Baldocchi, D. D. (2017) Evaluation Of Density Corrections To Methane Fluxes Measured By Open-Path Eddy Covariance Over Contrasting Landscapes, Boundary-Layer Meteorology, 207(), 117-126                             | 10.1007/s10546-017-0275-9                                                                                         | California Department of Water Resources, DOE AmeriFlux; Biometeorology Lab, University of California, Berkeley, PI: Dennis Baldocchi |
| 'US-Tw4' | '2013-2014' | Chamberlain, S. D., Verfaillie, J., Eichelmann, E., Hemes, K. S., Baldocchi, D. D. (2017) Evaluation Of Density Corrections To Methane Fluxes Measured By Open-Path Eddy Covariance Over Contrasting Landscapes, Boundary-Layer Meteorology, 122(1), 145-167                            | 10.1007/s10546-017-0275-9                                                                                         | Biometeorology Lab, University of California, Berkeley, PI: Dennis Baldocchi                                                          |
| 'US-Twt' | '2009-2014' | Baldocchi, D., S. Knox, I. Dronova, J. Verfaillie, P. Oikawa, C. Sturtevant, J. H. Matthes, and M. Detto. (2016) The impact of expanding flooded land area on the annual evaporation of rice. Agricultural and Forest Meteorology, Agricultural and Forest Meteorology, 223(6), 181-193 | <a href="http://dx.doi.org/10.1016/j.agrformet.2016.04.001">http://dx.doi.org/10.1016/j.agrformet.2016.04.001</a> | California Department of Water Resources; USDA/AFRI                                                                                   |
| 'US-UMB' | '2000-2014' | Bond-Lamberty, B. Fisk, J. Holm, J.A. Bailey, V. Bohrer, G. Gough, C.M. (2015) Moderate forest disturbance as a stringent                                                                                                                                                               | 10.5194/bg-12-513-2015                                                                                            | -                                                                                                                                     |

|          |             |                                                                                                                                                                                                                                                                     |                                  |                                                                                                                            |
|----------|-------------|---------------------------------------------------------------------------------------------------------------------------------------------------------------------------------------------------------------------------------------------------------------------|----------------------------------|----------------------------------------------------------------------------------------------------------------------------|
|          |             | test for gap and big-leaf models, Biogeosciences, 12(), 513-526                                                                                                                                                                                                     |                                  |                                                                                                                            |
| 'US-UMd' | '2007-2014' | Gough, C. M., Hardiman, B. S., Nave, L. E., Bohrer, G., Maurer, K. D., Vogel, C. S., Nadelhoffer, K. J., Curtis, P. S. (2013) Sustained Carbon Uptake And Storage Following Moderate Disturbance In A Great Lakes Forest, Ecological Applications, 23(5), 1202-1215 | 10.1890/12-1554.1                | -                                                                                                                          |
| 'US-Var' | '2000-2014' | Baldocchi, D. D., Xu, L., Kiang, N. (2004) How Plant Functional-Type, Weather, Seasonal Drought, And Soil Physical Properties Alter Water And Energy Fluxes Of An Oak-Grass Savanna And An Annual Grassland, Agricultural And Forest Meteorology, 123(1-2), 13-39   | 10.1016/j.agrform et.2003.11.006 | This research was supported in part by the Office of Science (BER), U.S. Department of Energy, Grant No. DE-FG02-03ER63638 |
| 'US-WCr' | '1999-2014' | Baker, I., Denning, A. S., Hanan, N., Prihodko, L., Uliasz, M., Vidale, P., Davis, K., Bakwin, P. (2003) Simulated And Observed Fluxes Of Sensible And Latent Heat And CO2 At The WLEF-TV Tower Using SiB2.5, Global Change Biology, 9(9), 1262-1277                | 10.1046/j.1365-2486.2003.00671.x | -                                                                                                                          |
| 'US-WPT' | '2011-2013' | Chu, H., Chen, J., Gottgens, J. F., Desai, A. R., Ouyang, Z., Qian, S. S. (2016) Response And Biophysical Regulation Of Carbon Dioxide Fluxes To Climate Variability And Anomaly In Contrasting Ecosystems In Northwestern Ohio, Usa,                               | 10.1016/j.agrform et.2016.01.008 | Supported by NOAA (NA10OAR4170224) & NSF (NSF1034791)                                                                      |

|          |             |                                                                                                                                                                                                                                                                                                                                                                                      |                                 |   |
|----------|-------------|--------------------------------------------------------------------------------------------------------------------------------------------------------------------------------------------------------------------------------------------------------------------------------------------------------------------------------------------------------------------------------------|---------------------------------|---|
|          |             | Agricultural And Forest Meteorology, 220(3), 50-68                                                                                                                                                                                                                                                                                                                                   |                                 |   |
| 'US-Whs' | '2007-2014' | Biederman, J. A., Scott, R. L., Goulden, M. L., Vargas, R., Litvak, M. E., Kolb, T. E., Yepez, E. A., Oechel, W. C., Blanken, P. D., Bell, T. W., Garatuza-Payan, J., Maurer, G. E., Dore, S., Burns, S. P. (2016) Terrestrial Carbon Balance In A Drier World: The Effects Of Water Availability In Southwestern North America, Global Change Biology, 22(5), 1867-1879             | 10.1111/gcb.13222               | - |
| 'US-Wi0' | '2002-2002' | Desai, A. R., Noormets, A., Bolstad, P. V., Chen, J., Cook, B. D., Davis, K. J., Euskirchen, E. S., Gough, C., Martin, J. G., Ricciuto, D. M., Schmid, H. P., Tang, J., Wang, W. (2008) Influence Of Vegetation And Seasonal Forcing On Carbon Dioxide Fluxes Across The Upper Midwest, Usa: Implications For Regional Scaling, Agricultural And Forest Meteorology, 148(2), 288-308 | 10.1016/j.agrformet.2007.08.001 | - |
| 'US-Wi1' | '2003-2003' | Desai, A. R., Noormets, A., Bolstad, P. V., Chen, J., Cook, B. D., Davis, K. J., Euskirchen, E. S., Gough, C., Martin, J. G., Ricciuto, D. M., Schmid, H. P., Tang, J., Wang, W. (2008) Influence Of Vegetation And Seasonal Forcing On Carbon Dioxide Fluxes                                                                                                                        | 10.1016/j.agrformet.2007.08.001 | - |

|          |             |                                                                                                                                                                                                                                                                                                                                                                                      |                                  |   |
|----------|-------------|--------------------------------------------------------------------------------------------------------------------------------------------------------------------------------------------------------------------------------------------------------------------------------------------------------------------------------------------------------------------------------------|----------------------------------|---|
|          |             | Across The Upper Midwest, Usa: Implications For Regional Scaling, Agricultural And Forest Meteorology, 148(2), 288-308                                                                                                                                                                                                                                                               |                                  |   |
| 'US-Wi2' | '2003-2003' | Desai, A. R., Noormets, A., Bolstad, P. V., Chen, J., Cook, B. D., Davis, K. J., Euskirchen, E. S., Gough, C., Martin, J. G., Ricciuto, D. M., Schmid, H. P., Tang, J., Wang, W. (2008) Influence Of Vegetation And Seasonal Forcing On Carbon Dioxide Fluxes Across The Upper Midwest, Usa: Implications For Regional Scaling, Agricultural And Forest Meteorology, 148(2), 288-308 | 10.1016/j.agrform et.2007.08.001 | - |
| 'US-Wi3' | '2002-2004' | Desai, A. R., Noormets, A., Bolstad, P. V., Chen, J., Cook, B. D., Davis, K. J., Euskirchen, E. S., Gough, C., Martin, J. G., Ricciuto, D. M., Schmid, H. P., Tang, J., Wang, W. (2008) Influence Of Vegetation And Seasonal Forcing On Carbon Dioxide Fluxes Across The Upper Midwest, Usa: Implications For Regional Scaling, Agricultural And Forest Meteorology, 148(2), 288-308 | 10.1016/j.agrform et.2007.08.001 | - |
| 'US-Wi4' | '2002-2005' | Desai, A. R., Noormets, A., Bolstad, P. V., Chen, J., Cook, B. D., Davis, K. J., Euskirchen, E. S., Gough, C., Martin, J. G., Ricciuto, D. M., Schmid, H. P., Tang, J., Wang, W. (2008) Influence Of Vegetation                                                                                                                                                                      | 10.1016/j.agrform et.2007.08.001 | - |



|          |             |                                                                                                                                                                                                                                                                                                                                                                                      |                                  |   |
|----------|-------------|--------------------------------------------------------------------------------------------------------------------------------------------------------------------------------------------------------------------------------------------------------------------------------------------------------------------------------------------------------------------------------------|----------------------------------|---|
|          |             | And Seasonal Forcing On Carbon Dioxide Fluxes Across The Upper Midwest, Usa: Implications For Regional Scaling, Agricultural And Forest Meteorology, 148(2), 288-308                                                                                                                                                                                                                 |                                  |   |
| 'US-Wi6' | '2002-2003' | Desai, A. R., Noormets, A., Bolstad, P. V., Chen, J., Cook, B. D., Davis, K. J., Euskirchen, E. S., Gough, C., Martin, J. G., Ricciuto, D. M., Schmid, H. P., Tang, J., Wang, W. (2008) Influence Of Vegetation And Seasonal Forcing On Carbon Dioxide Fluxes Across The Upper Midwest, Usa: Implications For Regional Scaling, Agricultural And Forest Meteorology, 148(2), 288-308 | 10.1016/j.agrform et.2007.08.001 | - |
| 'US-Wi8' | '2002-2002' | Desai, A. R., Noormets, A., Bolstad, P. V., Chen, J., Cook, B. D., Davis, K. J., Euskirchen, E. S., Gough, C., Martin, J. G., Ricciuto, D. M., Schmid, H. P., Tang, J., Wang, W. (2008) Influence Of Vegetation And Seasonal Forcing On Carbon Dioxide Fluxes Across The Upper Midwest, Usa: Implications For Regional Scaling, Agricultural And Forest Meteorology, 148(2), 288-308 | 10.1016/j.agrform et.2007.08.001 | - |
| 'US-Wkg' | '2004-2014' | Biederman, J. A., Scott, R. L., Goulden, M. L., Vargas, R., Litvak, M. E., Kolb, T. E., Yezpe, E. A., Oechel, W. C., Blanken, P. D., Bell, T. W., Garatuza-Payan, J.,                                                                                                                                                                                                                | 10.1111/gcb.13222                | - |

|          |             |                                                                                                                                                                                                                                                                                                                                                                                                                                                                                                                                    |   |   |
|----------|-------------|------------------------------------------------------------------------------------------------------------------------------------------------------------------------------------------------------------------------------------------------------------------------------------------------------------------------------------------------------------------------------------------------------------------------------------------------------------------------------------------------------------------------------------|---|---|
|          |             | Maurer, G. E., Dore, S., Burns, S. P. (2016) Terrestrial Carbon Balance In A Drier World: The Effects Of Water Availability In Southwestern North America, <i>Global Change Biology</i> , 22(5), 1867-1879                                                                                                                                                                                                                                                                                                                         |   |   |
| 'ZA-Kru' | '2000-2013' | Archibald, S. A., Kirton, A., Merwe, M. R. van der, Scholes, R. J., Williams, C. A. and Hanan, N.: Drivers of inter-annual variability in Net Ecosystem Exchange in a semi-arid savanna ecosystem, South Africa, <i>Biogeosciences</i> , 6(2), 251–266, 2009.                                                                                                                                                                                                                                                                      | - | - |
| 'ZM-Mon' | '2000-2009' | Merbold, L., Ardö, J., Arneeth, A., Scholes, R. J., Nouvellon, Y., Grandcourt, A. de, Archibald, S., Bonnefond, J. M., Boulain, N., Brueggemann, N., Bruemmer, C., Cappelaere, B., Ceschia, E., El-Khidir, H. A. M., El-Tahir, B. A., Falk, U., Lloyd, J., Kergoat, L., Dantec, V. L., Mougouin, E., Muchinda, M., Mukelabai, M. M., Ramier, D., Roupsard, O., Timouk, F., Veenendaal, E. M. and Kutsch, W. L.: Precipitation as driver of carbon fluxes in 11 African ecosystems, <i>Biogeosciences</i> , 6(6), 1027–1041, 2009b. | - | - |
